# Supplementary material for: Relevance of assessment items in community paramedicine home visit programmes: results of a modified Delphi study
Source: PubMed Central journal article supplement — BMJ Open. 2021 Nov 11;11(11):e048504. doi: 10.1136/bmjopen-2020-048504 (PMC8587454; doi:10.1136/bmjopen-2020-048504), 2021-11-11
Supplement: bmjopen-2020-048504.draft_revisions.pdf [file bmjopen-2020-048504.draft_revisions.pdf]

# BMJ Open

BMJ Open is committed to open peer review. As part of this commitment we make the peer review history of every article we publish publicly available.

When an article is published we post the peer reviewers' comments and the authors' responses online. We also post the versions of the paper that were used during peer review. These are the versions that the peer review comments apply to.

The versions of the paper that follow are the versions that were submitted during the peer review process. They are not the versions of record or the final published versions. They should not be cited or distributed as the published version of this manuscript.

BMJ Open is an open access journal and the full, final, typeset and author-corrected version of record of the manuscript is available on our site with no access controls, subscription charges or pay-per-view fees (<http://bmjopen.bmj.com>).

If you have any questions on BMJ Open's open peer review process please email [info.bmjopen@bmj.com](mailto:info.bmjopen@bmj.com)

# BMJ Open

## Relevance of assessment items in community paramedicine home visit programmes: results of a modified Delphi study

|                               |                                                                                                                                                                                                                                                                                                                                                                                                                                                                                                                                                                                                                        |
|-------------------------------|------------------------------------------------------------------------------------------------------------------------------------------------------------------------------------------------------------------------------------------------------------------------------------------------------------------------------------------------------------------------------------------------------------------------------------------------------------------------------------------------------------------------------------------------------------------------------------------------------------------------|
| Journal:                      | <i>BMJ Open</i>                                                                                                                                                                                                                                                                                                                                                                                                                                                                                                                                                                                                        |
| Manuscript ID                 | bmjopen-2020-048504                                                                                                                                                                                                                                                                                                                                                                                                                                                                                                                                                                                                    |
| Article Type:                 | Original research                                                                                                                                                                                                                                                                                                                                                                                                                                                                                                                                                                                                      |
| Date Submitted by the Author: | 28-Dec-2020                                                                                                                                                                                                                                                                                                                                                                                                                                                                                                                                                                                                            |
| Complete List of Authors:     | Leyenaar, Matthew; McMaster University, Allana, Amir; University of Toronto Faculty of Medicine, Institute of Health Policy Management & Evaluation<br>Sinha, Samir ; Sinai Health System, Geriatric Medicine; University of Toronto Faculty of Medicine<br>Nolan, Michael; County of Renfrew, Paramedic Service<br>Agarwal, Gina; McMaster University, Family Medicine<br>Tavares, Walter; University of Toronto Faculty of Medicine, The Wilson Centre and Post MD Education; University of Toronto Faculty of Medicine, Institute of Health Policy Management & Evaluation<br>Costa, Andrew P ; McMaster University |
| Keywords:                     | ACCIDENT & EMERGENCY MEDICINE, PREVENTIVE MEDICINE, PRIMARY CARE, HEALTH SERVICES ADMINISTRATION & MANAGEMENT, Protocols & guidelines < HEALTH SERVICES ADMINISTRATION & MANAGEMENT, STATISTICS & RESEARCH METHODS                                                                                                                                                                                                                                                                                                                                                                                                     |
|                               |                                                                                                                                                                                                                                                                                                                                                                                                                                                                                                                                                                                                                        |

SCHOLARONE™  
Manuscripts

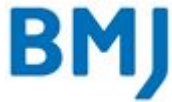

I, the Submitting Author has the right to grant and does grant on behalf of all authors of the Work (as defined in the below author licence), an exclusive licence and/or a non-exclusive licence for contributions from authors who are: i) UK Crown employees; ii) where BMJ has agreed a CC-BY licence shall apply, and/or iii) in accordance with the terms applicable for US Federal Government officers or employees acting as part of their official duties; on a worldwide, perpetual, irrevocable, royalty-free basis to BMJ Publishing Group Ltd ("BMJ") its licensees and where the relevant Journal is co-owned by BMJ to the co-owners of the Journal, to publish the Work in this journal and any other BMJ products and to exploit all rights, as set out in our [licence](#).

The Submitting Author accepts and understands that any supply made under these terms is made by BMJ to the Submitting Author unless you are acting as an employee on behalf of your employer or a postgraduate student of an affiliated institution which is paying any applicable article publishing charge ("APC") for Open Access articles. Where the Submitting Author wishes to make the Work available on an Open Access basis (and intends to pay the relevant APC), the terms of reuse of such Open Access shall be governed by a Creative Commons licence – details of these licences and which [Creative Commons](#) licence will apply to this Work are set out in our licence referred to above.

Other than as permitted in any relevant BMJ Author's Self Archiving Policies, I confirm this Work has not been accepted for publication elsewhere, is not being considered for publication elsewhere and does not duplicate material already published. I confirm all authors consent to publication of this Work and authorise the granting of this licence.

## Relevance of assessment items in community paramedicine home visit programmes: results of a modified Delphi study

### Author List: first name, last name, credentials

Matthew S Leyenaar, MA  
Amir Allana, BAsC  
Samir K Sinha, MD DPhil  
Michael Nolan, MA  
Gina Agarwal, MBBS PhD  
Walter Tavares, PhD  
Andrew P Costa, PhD

### Author Affiliations:

MSL, APC, GA: Department of Health Research Methods, Evidence, and Impact, McMaster University  
MSL, SKS, MN: The Ontario Community Paramedicine Secretariat  
MSL: The Department of Health and Wellness, Government of Prince Edward Island  
AA: Institute of Health Policy, Management and Evaluation, Dalla Lana School of Public Health, University of Toronto. Toronto Paramedic Service  
MN: County of Renfrew Paramedic Service  
GA: Department of Family Medicine, McMaster University  
WT: The Wilson Centre and Post MD Education, Institute of Health Policy, Management and Evaluation, University of Toronto and University Health Network. York Region Paramedic and Senior Services  
WT, SKS: Department of Medicine, University of Toronto

### Corresponding Author:

Matthew S Leyenaar

### Running Title: Relevant assessment in Community Paramedicine

**Keywords:** Emergency Medical Services, Community Paramedic, Care planning, Modified Delphi method

### Word Count:

### Funding Sources/Disclosures:

This research received no specific grant from any funding agency in the public, commercial or not-for-profit sectors. MSL has received funding for research drawing on this study from the Canadian Frailty Network, Mitacs Accelerate Internship Program, CIHR, and the Hamilton Niagara Haldimand Brant Local Health Integration Network (formerly the Hamilton Niagara Haldimand Brant Community Care Access Centre).

### Author Contributions:

MSL and APC conceived the study. MSL and APC developed the surveys, hosted the meeting, and consolidated the findings. MSL and AA prepared the first draft of the manuscript. All authors contributed to the design and methodology of this study and to the writing and critical editing of this manuscript.

### Conflict of Interests:

The authors declare no conflicts of interest

## ABSTRACT

### OBJECTIVE

Guidelines for a structured assessment in community paramedicine home visit programmes have not been established and evidence to inform their creation is lacking. We sought to investigate the relevance of assessment items to the practice of community paramedics according to a pre-established clarity-utility matrix.

### DESIGN

We designed a modified-Delphi study consisting of predetermined thresholds for achieving consensus, number of rounds of for scoring items, a defined meeting and discussion process, and a sample of participants that was purposefully representative.

### SETTING & PARTICIPANTS

We established a panel of 26 community paramedics representing 20 municipal paramedic services in Ontario, Canada. The sample represented a majority of paramedic services within the province that were operating a community paramedicine home visit program.

### MEASURES

64 assessment items that had been pilot tested in a standardized assessment instrument were scored according to their clarity (being free from ambiguity and easy to understand) and utility (being valued in care planning or case management activities). To conclude scoring rounds, assessment items that did not achieve consensus for relevance to assessment practices were discussed amongst participants with opportunities to modify assessment items for subsequent rounds of scoring.

### RESULTS

Resulting from the first round of scoring, 54 assessment items were identified as being relevant to assessment practices and 3 assessment items were removed from subsequent rounds. The remaining 7 assessment items were modified with some parts removed from the final items that achieved consensus in the final rounds of scoring.

### CONCLUSION

A broadly representative panel of community paramedics identified consensus for 61 assessment items that could be included in a structured, multi-domain, assessment instrument for guiding practice in community paramedicine home visit programmes.

### STRENGTHS AND LIMITATIONS OF THIS STUDY

- A broadly representative panel of frontline community paramedics participated in a multi-round process to find consensus
- Community paramedics were able to use a utility-clarity matrix to determine the relevance of assessment items included in a standardize assessment instrument designed for home visiting programmes
- The modified Delphi methodology enabled frontline community paramedics to navigate the tension that exists between standardization and adaptation to local and contextual criteria
- By investigating the relevance of assessment items in community paramedicine home visit programmes, the findings can contribute evidence towards clinical utility and validation of a standardized assessment instrument that is fit-for-purpose.

## Relevance of assessment items in community paramedicine home visit programmes: results of a modified Delphi study

### INTRODUCTION

Paramedics, as mobile healthcare providers with limited access to diagnostic tools, must include social and environmental observation, physical examination and oral history-taking in assessments to understand patient condition and make treatment decisions (1). In high-acuity emergencies, paramedics must quickly identify and treat threats to life and limb (1). In lower acuity situations, paramedics must consider multiple pathologies that may be contributing to a patient's condition through a more comprehensive and detailed problem-based approach (2). In all cases, paramedics must assess patients and the surrounding environment thoroughly to deliver appropriate patient care and maintain safety (1,3).

A structured process for patient assessment is common in paramedicine and other emergency settings (1,4). Structured assessment processes have been identified as important to guiding practice, reducing errors or adverse events, and contributing to accuracy needed for improving patient care in many settings (1,5–8). Structured frameworks for assessments might include mnemonics or other tools or prompts to help ensure completeness and that findings are relevant to clinical practice (5,8). Common terminology and standardized documentation are helpful when communicating assessment findings with other members of the care team (7).

Community paramedicine is an emerging area of paramedic practice where paramedics with broadened skillsets provide low-acuity and preventative care, often collaborating with other members of patients' care teams in community settings (9,10). In community paramedicine home visit programmes, paramedics visit patients at home to identify, treat, and conduct referrals for emerging health and social needs (10,11). This represents an extension of low acuity paramedic practice, with new aspects of patient assessment required for improved care integration, care planning, case management (10). While consistent, structured processes for patient assessment in paramedicine have long been in place (1), how they have been re-directed or altered for application in community paramedicine settings is not clear. Broad guidelines for structuring patient assessment in community paramedicine settings have not been established and concerns have been identified about potentially inconsistent assessment practices within and across regional jurisdictions (11).

The purpose of the Community Paramedicine Assessment Matters (CPAM) study was to explore consensus on the most relevant assessment items that should be included in structured, multi-dimensional, comprehensive, patient assessment practices for community paramedicine home visit programmes. Such assessment practices should capture the health, social, and environmental considerations needed to direct community paramedic care planning and case management activities. In the absence of other sources of evidence, we expect that determining expert opinion will provide the best source of information (12) needed to identify assessment items that might provide clarity and utility in clinical practice and determine what matters during an assessment conducted by a community paramedic in a community paramedicine home visit program.

### METHODS

#### *Study Design*

A modified Delphi process was used consisting of multiple iterations of online questionnaires and web-based discussions with an expert panel of community paramedics from one Canadian province. The questionnaires asked participants to evaluate individual assessment items for relevance to practice. Assessment items (as grouped according to assessment domains) were derived from an instrument that had been pilot tested in multiple sites through the CARPE Study (ISRCTN 58273216). Web-based discussions were hosted between each iteration of the questionnaire to discuss results.

### *Ethics*

The Hamilton Integrated Research Ethics Board approved the study.

### *Patient and public involvement*

Patients and members of the public were not involved in this study.

### *Recruitment and study orientation*

All paramedic services in Ontario providing home visit programmes, identified in a 2019 provincial report on community paramedicine (13), were invited to participate in the study. Each paramedic service was allowed a maximum of three participants. A minimum of 24 participants with representation from at least 50% of Ontario paramedic services with home visit programmes was considered to be representative. We could allow for a maximum of 36 participants due to logistics and budget. Recruitment of participants was facilitated by the Ontario Community Paramedicine Secretariat. Selection of participants (within the minimum and maximum number) was based on maximizing the number of representative services.

To participate, community paramedics needed to be certified as critical, advanced, or primary care and be working in a community paramedicine home visit program that included patient assessment as part of their regular clinical practice. Exclusion criteria were defined for paramedics who had an organizational rank of commander or higher unless they could demonstrate that patient assessment was a regular component of their assigned duties. Paramedics in acting or temporary administrative roles, or those who assume those roles over the course of the study were not excluded.

Interested participants were invited to participate in an information and orientation session where they were presented with an outline of the aims and structure for the study. Prior to beginning the first round of scoring, participants provided written consent. Participants received gift cards of increasing value for each round that they participated in.

### *Finding Consensus*

We investigated two dimensions of relevance—clarity and utility—during each round of the modified Delphi process. Clarity of an item described the ease to which the information provided through an assessment item could be understood by the community paramedic and was free from ambiguity. Utility of an assessment item reflected whether or not the item was considered to be useful to the community paramedic's role in care planning or case management. The question of utility investigated whether or not actionable information would be generated by an assessment item. The rationale for including two dimensions to relevance was to establish a relationship between any individual assessment item included in an assessment instrument and the practice of assessment to inform care planning and case management activities. For example, if an assessment item is clearly understood (high clarity) but does not provide actionable information (low utility) then it is not likely contributing to patient assessment. Alternatively, if an assessment item cannot be clearly understood (low clarity), even if it is determined to be actionable (high utility), then how it is acted upon may vary from one situation to another. If an item is neither clearly understood (low clarity) nor actionable (low utility), then it is not considered to be relevant to assessment practice. For any assessment item to be considered relevant, it would need to satisfy the conditions according to the two dimensions identified (illustrated in Figure 1).

For an item to reach consensus, two-thirds (66.7%) of responses needed to either fall in the relevant or not relevant portions of the matrix illustrated in Figure 1. Assessment items were grouped according to assessment domains. If no items within a domain were identified as being relevant, the domain was removed from subsequent rounds. Secondary analysis was conducted to review assessment items where

|         |                 |   | Clarity            |                           |                         |
|---------|-----------------|---|--------------------|---------------------------|-------------------------|
|         |                 |   | Easy to Understand | Moderately Understandable | Difficult to Understand |
|         |                 |   | 3                  | 2                         | 1                       |
| Utility | Very Useful     | 3 | Relevant           | Relevant                  |                         |
|         | Somewhat Useful | 2 | Relevant           |                           | Not Relevant            |
|         | Not Useful      | 1 |                    | Not Relevant              | Not Relevant            |

Figure 1: Matrix of clarity and utility used to define relevance of assessment items

greater than one-third (33.3%) of responses were within the central variable of either of the individual dimensions (somewhat useful or moderately understandable).

#### *Delphi Rounds*

To help prevent participant fatigue and ensure ongoing participation, it was

decided at the outset of the study that a maximum of three rounds of scoring would be used. Each round began with an online questionnaire to determine the clarity and utility of each assessment item by the participating community paramedics. Participants reviewed each assessment item and scored it on two separate 3-point Likert scales (as illustrated in Figure 1) to determine its relevance. After the first round, participants also received the proportion of responses according to each dimension of relevance from the preceding round. Each questionnaire presented assessment items grouped in domains and ordered in the sequence as they appeared in the CARPE Assessment instrument. Questionnaires were pilot tested with a minimum of three participants before each round to determine approximate length of time needed for completion, and to refine the questionnaire if necessary. Participants were sent a web-link to the questionnaire at the beginning of each round of scoring. Each round of scoring was open for two weeks with reminder emails sent between 48h and 72h prior to closing of each round.

Between each round of scoring a web-conferencing meeting was held to discuss results of the preceding round and introduce the subsequent round. Results were summarized for assessment items that were classified as either relevant, not relevant, or consensus not reached. In the cases where consensus was not reached on the relevance of assessment items, discussions included characteristics of the assessment items that were not actionable in care planning activities or that were not clear. If participants indicated that an assessment item was difficult to understand, discussions explored how it could be modified (condensed or expanded), depending on context for assessment practices, for the next round of scoring. At conclusion of the three rounds of scoring, assessment items would be classified as either relevant, not relevant, modified, or consensus not reached. Modified multi-part assessment items were reorganized to gather sub-parts into new multi-part assessment items. Each web conference was recorded and shared with participants who were not able to attend.

## RESULTS

### *Panel & participation*

Twenty-six community paramedics from twenty paramedic services agreed to participate in the study. All twenty-six participated in the first survey. Sixteen (62%) participated in the first meeting (12 in real-time, 4 by viewing the recording). Twenty (77%) participated in the second survey. Eleven (42%) participants joined the second meeting. The final survey was completed by 24 (92%) participants. Table 1 provides a summary of participation.

### *Rounds*

The first round presented a total of 64 assessment items grouped according to 14 assessment domains



(See Figure 2 and Table 2). No items had responses indicating that they were not relevant to practice but one domain (which included three items) did not yield any responses that achieved consensus for relevance. Fifty-four items from eight domains met criteria for relevance to practice. The remaining seven items were presented to participants for discussion at the meeting to concluded round one. Secondary analysis identified 25 assessment items where more than one-third of responses were within the central variable in one of the individual dimensions of relevance, clarity or utility.

| Study Stage           | Participation<br>(including watching<br>recorded meeting) | %   |
|-----------------------|-----------------------------------------------------------|-----|
| Round 1 Questionnaire | 26                                                        | 100 |
| Round 1 Meeting       | 16 (4)                                                    | 62  |
| Round 2 Questionnaire | 20                                                        | 77  |
| Round 2 Meeting       | 11 (5)                                                    | 42  |
| Round 3 Questionnaire | 24                                                        | 92  |

| Assessment Domain                                 | Number of Assessment<br>Items, Round #1 | Number of Modified<br>Assessment Items,<br>Round #2 | Number of Modified<br>Assessment Items,<br>Round #3 |
|---------------------------------------------------|-----------------------------------------|-----------------------------------------------------|-----------------------------------------------------|
| Living Arrangement                                | 3                                       |                                                     |                                                     |
| Cognition                                         | 4                                       |                                                     |                                                     |
| Communication &<br>Vision                         | 4                                       |                                                     |                                                     |
| Mood                                              | 2                                       |                                                     |                                                     |
| Psychosocial Well-<br>Being & Social<br>Isolation | 13                                      |                                                     |                                                     |
| Functional Status                                 | 7                                       | 19                                                  | 19                                                  |
| Continenence                                      | 3                                       |                                                     |                                                     |
| Disease Diagnoses                                 | 1                                       | 5                                                   |                                                     |
| Health Conditions                                 | 9                                       | 22                                                  | 3                                                   |
| Nutritional Status                                | 2                                       |                                                     |                                                     |
| Medications                                       | 5                                       |                                                     |                                                     |
| Treatments &<br>Procedures                        | 6                                       |                                                     |                                                     |
| Home Environment                                  | 4                                       |                                                     |                                                     |
| Personal Goals                                    | 1                                       |                                                     |                                                     |
| TOTAL                                             | 64                                      | 46                                                  | 22                                                  |

To accommodate the time constraints necessary to discuss the number of assessment items, the discussion was focused specifically on the seven assessment items that did not achieve consensus. Given

that many of these assessment items had multiple parts with multiple categories of potential findings, discussion included options for reducing item complexity; either by reducing categories for responses or by separating multi-part items into single part items. The meeting participants suggested that multi-level responses were more important. As a result, the questionnaire for the second round re-organized the seven multi-part items into 46 single-part items (See Table 3 for examples).

Resulting from the second-round questionnaire, 22 of the modified assessment items achieved consensus on relevance (See Figure 2). Secondary analysis identified that seven assessment items had one-third of responses within the central variable of an individual dimension of relevance. Discussion at the second-round meeting focused on of assessment items that could have simplified response categories. The outcome from the second-round meeting was the removal of two modified parts and the re-organization of the remaining 22 assessment items into simplified response categories (See Table 3). The modified assessment items from the second (and third) round were reorganized into seven items representing edited versions of the seven items that did not achieve consensus after the first round.

In the third and final round of scoring, one modified assessment item did not achieve consensus on relevance while the remaining 21 did (See Figure 2). The outcome from the three rounds of scoring meant that 54 original assessment items and 7 modified assessment items were identified as being relevant to assessments in community paramedicine home visit programmes. In the modification process, three parts of assessment items included in the original set of assessment items were removed.

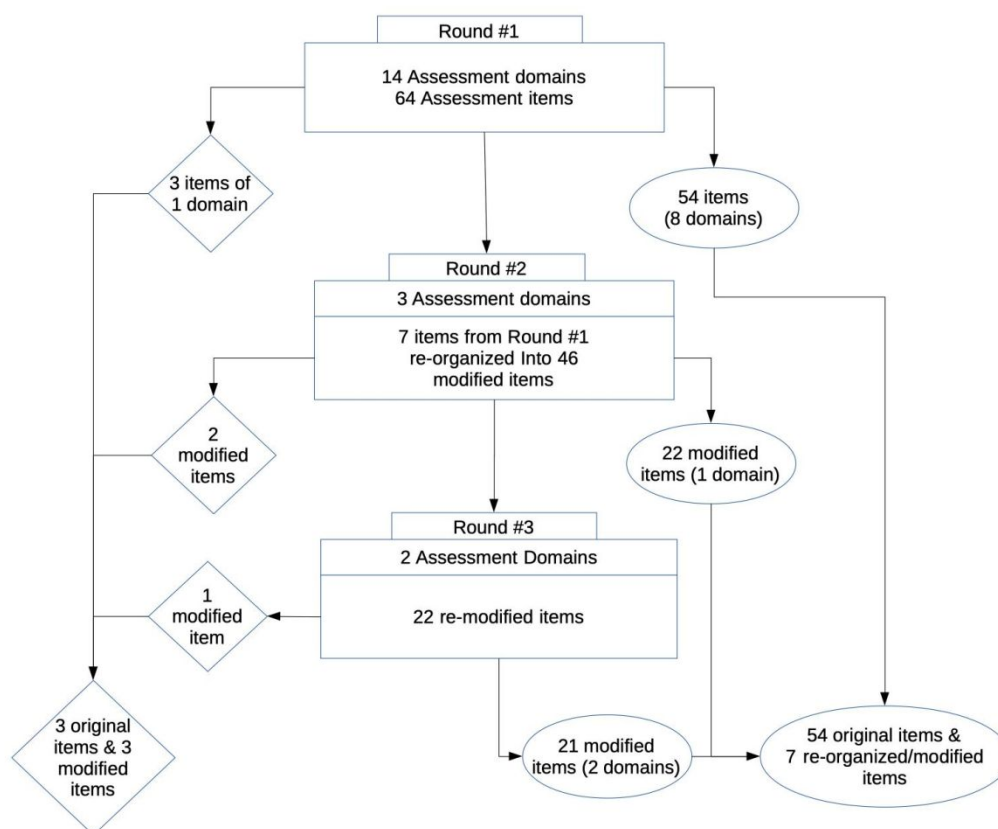

Figure 2: Illustration representing outcomes from each round of the study. Diamonds represent consensus for exclusion/removal of assessment items, ellipses represent consensus for relevance of assessment items.

1  
2  
3  
4  
5  
6  
7  
8  
9  
10  
11  
12  
13  
14  
15  
16  
17  
18  
19  
20  
21  
22  
23  
24  
25  
26  
27  
28  
29  
30  
31  
32

| Assessment item presented in Round #1                                                                                                                                                                                          | Modification of assessment item presented in Round #2                                                                                                                            | Modification of assessment item presented in Round #3                                                                                   | Final re-organization following scoring                                                                                                                                                                                           |
|--------------------------------------------------------------------------------------------------------------------------------------------------------------------------------------------------------------------------------|----------------------------------------------------------------------------------------------------------------------------------------------------------------------------------|-----------------------------------------------------------------------------------------------------------------------------------------|-----------------------------------------------------------------------------------------------------------------------------------------------------------------------------------------------------------------------------------|
| Assessment of ability to perform activities of daily living (ADLs). Assessment item includes 11 specific ADLs to assess and provides 8 response categories for levels of dependence from fully independent to fully dependent. | Each specific ADL is presented separately to participants while maintaining the original response categories for levels of dependence from fully independent to fully dependent. | Each specific ADL is presented separately to participants with response categories simplified to either independent or not independent. | Those ADLs that were scored as being relevant were reorganized into one new assessment item including 10 ADLs with response categories of independent or not independent. One modified assessment item did not achieve consensus. |
| Presented as one assessment item.                                                                                                                                                                                              | Presented as 11 modified items.                                                                                                                                                  | Presented as 11 modified items                                                                                                          | Presented as 1 reorganized item identified as being relevant and 1 modified item as not achieving consensus.                                                                                                                      |

Further details on modifications are presented in Supplemental Table 1.

## DISCUSSION

Community paramedicine home visit programmes represent a relatively new area of practice for paramedics that re-direct their skills towards preventive and integrated patient care (14). Where assessment practices and guidelines have been established for emergency response, assessment practices and guidelines for community paramedics are still being established (10,15,16). Through taking a consensus-based approach with a panel of community paramedics from a cross-section of paramedic services, this study provides new information towards the standardization of assessment practices in community paramedicine home visit programmes.

### *Implications for clinical practice*

The relevance of assessment items in domains such as home environment, functional status, and psychosocial wellbeing expand on existing paramedic assessment practices such as physical examination and medical history-taking. This reflects the underlying values and purpose of community paramedicine as a patient-centered approach that equally prioritizes the biological, psychological, and social determinants of health (14,17). Such comprehensive assessment practices are enabled by the low-acuity and less time-sensitive conditions in which community paramedic home visit programmes operate, as opposed to the norms of emergency response paramedicine where assessment focuses on the most emergent short-term medical needs (1).

Paramedic assessment in emergency response is geared towards guiding immediate treatment decisions and relaying pertinent information to emergency department staff, both examples of short-term care planning and treatment (1,2). In contrast, community paramedicine assessments are likely to identify medium- and long-term care needs. The breadth and depth of assessment items that the expert panel

1  
2  
3 considered relevant to practice suggests that the community paramedics who participated recognize their  
4 ability to take action on a range of patient needs that would necessitate the involvement of other  
5 healthcare providers from disciplines such as family medicine, occupational therapy, social work,  
6 pharmacy, and community nursing. Team-based delivery of care introduces a higher level of complexity  
7 and uncertainty to assessment practices. How a community paramedic's assessment informs their own  
8 care planning in comparison to its utility to a larger care team is unclear. It is also unclear to what extent  
9 assessment may be duplicated by other care providers, and whether or not they would be in agreement  
10 with the community paramedic's assessment. The degree of integration (functional and professional)  
11 between different members of a patient's care team, which community paramedics is a part of, remains an  
12 ongoing area of research in integrated care (18).

13  
14 Previously published studies investigating assessment practices by community paramedics have  
15 considered different components of the assessment process (10,11,19). Principles of patient assessment  
16 both in paramedicine and other health settings reflect how the assessment process is a guiding component  
17 of any patient care activity (1,6). Assessments should gather the clinical and social information about  
18 patient condition (1,6,7,20). Asking community paramedics about the relevance of assessment items  
19 reveals what parts of an assessment process inform the delivery of care in their practice setting and is  
20 informative to how practice has evolved from the emergency setting. Implications from this study will be  
21 identifying what barriers or inconsistencies to community paramedic practice still need to be addressed.  
22 Paramedics are well situated to identify these challenges.

### 23 24 *Strengths*

25 In the absence of evidence about community paramedic patient assessment practices, it serves well  
26 to identify what community paramedics identify as relevant to the care that they are delivering—  
27 particularly when the delivery of care is part of an expanded role or extended scope of practice. Asking an  
28 expert panel is consistent with best practice when a definite evidence base is lacking. The methodology  
29 followed through our investigation is consistent with recommendations for modified Delphi studies (21).  
30 Panel selection was outlined in a reproducible way. Consensus was defined a priori. The number of  
31 rounds was specified. Criteria were established to guide discussions.

32  
33 Criticism of modified Delphi studies is often centred around unclear processes, a biased sampling  
34 process for establishing participation, or not having clearly established goals (21,22). We established a  
35 panel that was broadly representative of practice in Ontario. The process that was outlined and followed  
36 suggests that the clarity-utility matrix we established provided a functional method to define relevance of  
37 assessment items to assessment practices. The clarity-utility matrix could be broadly applied to future  
38 studies exploring paramedic practice or assessment practices in other settings.

### 39 40 *Limitations*

41 This study was limited to the Ontario context. While participation levels were adequate across all  
42 rounds of scoring and options were available for participants to view recorded meeting proceedings, we  
43 did not exclude participants if they were unable to complete one of the scoring rounds or join one of the  
44 meetings. For example, it is likely that some participants were less informed entering the third round than  
45 others. The structure of the questionnaires and each paramedics familiarity with their individual  
46 assessment practices should have been adequate in such circumstances and still provide meaningful  
47 insight because individual community paramedic practices can vary widely across different health  
48 systems (9,17). While repeating this study in other jurisdictions may yield different or conflicting results,  
49 that community paramedicine home visit programmes are becoming more ubiquitous, means the results of  
50 this study can contribute to establishing assessment practice guidelines across a wider range of  
51 jurisdictions.

52  
53 We did not examine how community paramedic assessment items compare with those used by  
54 other members of the patient care team, and our Delphi panel consisted only of paramedics. Given the  
55 multi-disciplinary nature of community paramedicine, other work has explored some of these questions  
56 (19). It will be useful to know to what extent community paramedic assessment items reflect best practice  
57  
58

1  
2  
3 from other fields of health and social care.  
4

#### 5 *Future Work*

6 Patient-centred care includes reducing barriers to access and better care coordination, consistent  
7 with aims of community paramedicine programmes. Future studies could expand on our findings by  
8 examining multiple aspects of community paramedic assessments, including testing different measures of  
9 reliability and validity. Future studies should also examine the patient perspective on what they feel is  
10 relevant to be included in a structured assessment process.  
11

12 As the evidence base grows for community paramedicine assessment practices it will lead to a level  
13 of standardization and consistency across jurisdictions and programmes. Future work could then examine  
14 the efficacy of these assessment practices by examining process- and outcome-based indicators such as  
15 access to care, service utilization, and measures of patient health. The development of practice guidelines  
16 in community paramedicine will also help develop processes for quality improvement and performance  
17 measurement. Evaluating consistent assessment practices in community paramedicine home visit  
18 programmes presents the opportunity to measure changes in patient condition over time and further  
19 improve case management.  
20

#### 21 CONCLUSION

22 Uptake of assessment guidelines that are broadly applicable to differing community paramedicine  
23 programme design is important step in the growth, evolution, and emergence of new community  
24 paramedicine programming. By establishing consensus on the relevance of specific assessment items to  
25 detect health and social factors that drive functional decline, social isolation, loss of independence, and  
26 ultimately repeated emergency calls, we believe that guidelines for assessment in community  
27 paramedicine programmes will be strengthened with improved case-finding and care-planning expected  
28 to follow.  
29  
30  
31  
32  
33  
34  
35  
36  
37  
38  
39  
40  
41  
42  
43  
44  
45  
46  
47  
48  
49  
50  
51  
52  
53  
54  
55  
56  
57  
58  
59  
60

## REFERENCES:

1. Colbeck MA, Maria S, Eaton G, Campbell C, Batt AM, Caffey MR. International Examination and Synthesis of the Primary and Secondary Surveys in Paramedicine. *Irish J Paramed*. 2018;3(2):1–9.
2. Ambulance Victoria. Ambulance Victoria Patient Assessment Standards. 2019. p. 1–52.
3. Jensen JL, Croskerry P, Travers AH. Consensus on paramedic clinical decisions during high-acuity emergency calls: Results of a Canadian Delphi study. *Can J Emerg Med*. 2011;13(5):310–8.
4. Curtis K, Murphy M, Hoy S, Lewis MJ. The emergency nursing assessment process-A structured framework for a systematic approach. *Australas Emerg Nurs J*. 2009;12(4):130–6.
5. Munroe B, Curtis K, Considine J, Buckley T. The impact structured patient assessment frameworks have on patient care: An integrative review. *J Clin Nurs*. 2013;22(21–22):2991–3005.
6. Munroe B, Curtis K, Murphy M, Strachan L, Buckley T. HIRAID: An evidence-informed emergency nursing assessment framework. *Australas Emerg Nurs J* [Internet]. 2015;18(2):83–97. Available from: <http://dx.doi.org/10.1016/j.aenj.2015.02.001>
7. Gray LC, Berg K, Fries BE, Henrard JC, Hirdes JP, Steel K, et al. Sharing clinical information across care settings: The birth of an integrated assessment system. *BMC Health Serv Res* [Internet]. 2009;9:1–10. Available from: <http://bmchealthservres.biomedcentral.com/articles/10.1186/1472-6963-9-71>
8. Reynolds T, Thornicroft G, Abas M, Woods B, Hoe J, Leese M, et al. Camberwell Assessment of Need for the Elderly (CANE). Development, validity and reliability. *Br J Psychiatry*. 2000;176(MAY):444–52.
9. Chan J, Griffith LE, Costa AP, Leyenaar MS, Agarwal G. Community paramedicine: A systematic review of program descriptions and training. *CJEM* [Internet]. 2019;21(6):749–61. Available from: <https://doi.org/10.1017/cem.2019.14>
10. Leyenaar M, Mcleod B, Chan J, Tavares W, Costa A, Agarwal G. A scoping study and qualitative assessment of care planning and case management in community paramedicine. *Irish J Paramed*. 2018;3(July):1–15.
11. Leyenaar MS, McLeod B, Penhearow S, Strum R, Brydges M, Mercier E, et al. What do community paramedics assess? An environmental scan and content analysis of patient assessment in community paramedicine. *CJEM Can J Emerg Med Care* [Internet]. 2019 [cited 2019 Aug 2]; Available from: <https://doi.org/10.1017/cem.2019.379>
12. Hsu C-C, Sandford BA. The Delphi Technique: Making Sense of Consensus. *Pract Assessment, Res Eval*. 2007;12:10.
13. Leyenaar MS, Strum R, Haque M, Nolan M, Sinha SK, Ontario Community Paramedicine Secretariat Steering Committee. Report on the Status of Community Paramedicine in Ontario [Internet]. 2019. Available from: <https://www.ontariocpsecretariat.ca/resources>
14. O'Meara P, Stirling C, Ruest M. Community paramedicine model of care: an observational, ethnographic case study. *BMC Health Serv Res* [Internet]. 2016 Dec 2 [cited 2016 Oct 26];16(1):39. Available from: <http://www.biomedcentral.com/1472-6963/16/39>
15. O'Meara P. Community paramedics : a scoping review of their emergence and potential impact. *Int Paramed Pract*. 2014;4(1):5–12.
16. Choi BY, Blumberg C, Williams K. Mobile Integrated Health Care and Community Paramedicine : An Emerging Emergency Medical Services Concept. *Ann Emerg Med* [Internet]. 2016;67(3):361–6. Available from: <http://dx.doi.org/10.1016/j.annemergmed.2015.06.005>
17. Rasku T, Kaunonen M, Thyer E, Paavilainen E, Joronen K. The core components of Community Paramedicine - integrated care in primary care setting: a scoping review. *Scand J Caring Sci* [Internet]. 2019; Available from: <http://doi.wiley.com/10.1111/scs.12659>
18. Valentijn PP, Boesveld IC, van der Klauw DM, Ruwaard D, Struijs JN, Molema JJW, et al. Towards a taxonomy for integrated care: A mixed-methods study. *Int J Integr Care*. 2015 Mar 4;15(Jan-Mar 2015).

- 1  
2  
3 19. Leyenaar MS, Strum RP, Batt AM, Sinha S, Nolan M, Agarwal G, et al. Examining consensus for  
4 a standardised patient assessment in community paramedicine home visits: A RAND/UCLA-  
5 modified Delphi Study. *BMJ Open*. 2019 Oct;9(10):e031956.  
6  
7 20. Curtis K, Munroe B, Van C, Elphick TL. The implementation and usability of HIRAID, a  
8 structured approach to emergency nursing assessment. *Australas Emerg Care* [Internet].  
9 2020;23(1):62–70. Available from: <https://doi.org/10.1016/j.auec.2019.10.001>  
10  
11 21. Diamond IR, Grant RC, Feldman BM, Pencharz PB, Ling SC, Moore AM, et al. Defining  
12 consensus: A systematic review recommends methodologic criteria for reporting of Delphi studies.  
13 *J Clin Epidemiol* [Internet]. 2014;67(4):401–9. Available from:  
14 <http://dx.doi.org/10.1016/j.jclinepi.2013.12.002>  
15  
16 22. Jünger S, Payne SA, Brine J, Radbruch L, Brearley SG. Guidance on Conducting and REporting  
17 DELphi Studies (CREDES) in palliative care: Recommendations based on a methodological  
18 systematic review. *Palliat Med*. 2017;31(8):684–706.  
19  
20  
21  
22  
23  
24  
25  
26  
27  
28  
29  
30  
31  
32  
33  
34  
35  
36  
37  
38  
39  
40  
41  
42  
43  
44  
45  
46  
47  
48  
49  
50  
51  
52  
53  
54  
55  
56  
57  
58  
59  
60

Supplement Table 1: Example of presentation and modification of an assessment item across rounds (Note: selected sub-parts included in Table for illustrative purposes).

| Assessment item presented in Round #1                                                                                                                                                                                                                                                                                                                                                                                                                                                                                                                                                                                                                           | Modification of assessment item presented in Round #2                                                                                                                                                                                                                                                                                                                                                                                                                                                                                                                                                       | Modification of assessment item presented in Round #3                                                                                                                                                                                                                                                                                                                                                                                                                                                     |
|-----------------------------------------------------------------------------------------------------------------------------------------------------------------------------------------------------------------------------------------------------------------------------------------------------------------------------------------------------------------------------------------------------------------------------------------------------------------------------------------------------------------------------------------------------------------------------------------------------------------------------------------------------------------|-------------------------------------------------------------------------------------------------------------------------------------------------------------------------------------------------------------------------------------------------------------------------------------------------------------------------------------------------------------------------------------------------------------------------------------------------------------------------------------------------------------------------------------------------------------------------------------------------------------|-----------------------------------------------------------------------------------------------------------------------------------------------------------------------------------------------------------------------------------------------------------------------------------------------------------------------------------------------------------------------------------------------------------------------------------------------------------------------------------------------------------|
|                                                                                                                                                                                                                                                                                                                                                                                                                                                                                                                                                                                                                                                                 | <p>Assessment should include determining a patient's <u>self-performance</u> of activities of daily living (ADLs). In your assessment, consider all episodes over 3-day period. Determine if all episodes are performed independently or if any episodes required supervision or assistance. To further explore these responses, we have divided the assessment item into separate ADLs. Please consider each of the following ADLs to include when assessing a patient for the first time, at a first visit:</p>                                                                                           | <p>Assessment should include determining a patient's <u>self-performance</u> of activities of daily living (ADLs). In your assessment, consider all episodes over 3-day period. Determine if all episodes are performed independently or if any episodes required supervision or assistance. We have simplified responses to separate ADL assessment items to two possibilities. Please consider each of the following ADLs to include when assessing a patient for the first time, at a first visit.</p> |
| <p>Considering assessment of ability to perform activities of daily living (ADL). In each of the following areas, assessment determines what a patient's actual ability was over the 3-day period preceding the assessment. If all episodes are performed at the same level, score ADL at that level. If any episodes at level 6, and others less dependent, score ADL as a 5. Otherwise, focus on the three most dependent episodes [or all episodes if performed fewer than 3 times]. If most dependent episode is 1, score ADL as 1. If not, score ADL as least dependent of those episodes in range 2–5.</p> <p>a) Bathing—How takes a full-body bath /</p> | <p>a) Bathing—How takes a full-body bath / shower. Includes how transfers in and out of tub or shower AND how each part of body is bathed: arms, upper and lower legs, chest, abdomen, perineal area—EXCLUDE WASHING OF BACK AND HAIR</p> <ol style="list-style-type: none"> <li>0. Independent—No physical assistance, set-up, or supervision in any episode</li> <li>1. Independent, set-up help only—Article or device provided or placed within reach, no physical assistance or supervision in any episode</li> <li>2. Supervision—Oversight / cueing</li> <li>3. Limited assistance—Guided</li> </ol> | <p>a) Bathing—How takes a full-body bath / shower. Includes how transfers in and out of tub or shower AND how each part of body is bathed: arms, upper and lower legs, chest, abdomen, perineal area—EXCLUDE WASHING OF BACK AND HAIR</p> <ol style="list-style-type: none"> <li>0. Independent or set-up help only</li> <li>1. Supervision or any physical assistance</li> </ol>                                                                                                                         |



1  
2  
3  
4  
5  
6  
7  
8  
9  
10  
11  
12  
13  
14  
15  
16  
17  
18  
19  
20  
21  
22  
23  
24  
25  
26  
27  
28  
29  
30  
31  
32  
33  
34  
35  
36  
37  
38  
39  
40  
41  
42  
43  
44  
45  
46  
47

|                                                                                                                                                                                                                                                                                                                                                                                                                                                                                                                                                                                                                                                                                     |                                                                                                                                                                                                                                                                                                                                                                                                                                                                                                                                                                                                                                                                                              |                                                                                                                                                                                                                                                                                           |
|-------------------------------------------------------------------------------------------------------------------------------------------------------------------------------------------------------------------------------------------------------------------------------------------------------------------------------------------------------------------------------------------------------------------------------------------------------------------------------------------------------------------------------------------------------------------------------------------------------------------------------------------------------------------------------------|----------------------------------------------------------------------------------------------------------------------------------------------------------------------------------------------------------------------------------------------------------------------------------------------------------------------------------------------------------------------------------------------------------------------------------------------------------------------------------------------------------------------------------------------------------------------------------------------------------------------------------------------------------------------------------------------|-------------------------------------------------------------------------------------------------------------------------------------------------------------------------------------------------------------------------------------------------------------------------------------------|
| <p>shower. Includes how transfers in and out of tub or shower AND how each part of body is bathed: arms, upper and lower legs, chest, abdomen, perineal area—<b>EXCLUDE WASHING OF BACK AND HAIR</b></p> <p>b) Personal hygiene—How manages personal hygiene, including combing hair, brushing teeth, shaving, applying make-up, washing and drying face and hands—<b>EXCLUDE BATHS AND SHOWERS</b></p> <p>c) Dressing upper body—How dresses and undresses (street clothes, underwear) above the waist, including prostheses, orthotics, fasteners, pullovers, etc.</p>                                                                                                            | <p>manoeuvring of limbs, physical guidance without taking weight</p> <p>4. Extensive assistance—Weight-bearing support (including lifting limbs) by 1 helper where person still performs 50% or more of subtasks</p> <p>5. Maximal assistance—Weight-bearing support (including lifting limbs) by 2+ helpers—OR—Weight-bearing support for more than 50% of subtasks</p> <p>6. Total dependence—Full performance by others during all episodes</p> <p>7. Activity did not occur during entire period</p>                                                                                                                                                                                     |                                                                                                                                                                                                                                                                                           |
| <p>d) Dressing lower body—How dresses and undresses (street clothes, underwear) from the waist down including prostheses, orthotics, belts, pants, skirts, shoes, fasteners, etc.</p> <p>0. Independent—No physical assistance, set-up, or supervision in any episode</p> <p>1. Independent, set-up help only—Article or device provided or placed within reach, no physical assistance or supervision in any episode</p> <p>2. Supervision—Oversight / cueing</p> <p>3. Limited assistance—Guided manoeuvring of limbs, physical guidance without taking weight</p> <p>4. Extensive assistance—Weight-bearing support (including lifting limbs) by 1 helper where person still</p> | <p>b) Personal hygiene—How manages personal hygiene, including combing hair, brushing teeth, shaving, applying make-up, washing and drying face and hands—<b>EXCLUDE BATHS AND SHOWERS</b></p> <p>0. Independent—No physical assistance, set-up, or supervision in any episode</p> <p>1. Independent, set-up help only—Article or device provided or placed within reach, no physical assistance or supervision in any episode</p> <p>2. Supervision—Oversight / cueing</p> <p>3. Limited assistance—Guided manoeuvring of limbs, physical guidance without taking weight</p> <p>4. Extensive assistance—Weight-bearing support (including lifting limbs) by 1 helper where person still</p> | <p>b) Personal hygiene—How manages personal hygiene, including combing hair, brushing teeth, shaving, applying make-up, washing and drying face and hands—<b>EXCLUDE BATHS AND SHOWERS</b></p> <p>0. Independent or set-up help only</p> <p>1. Supervision or any physical assistance</p> |

|                                                                                                                                                                                                                                                                                                                             |                                                                                                                                                                                                                                                                                                                                                                                                                                                                                                                                                                                                                                                                                                                                                                                                                                                     |                                                                                                                                                                                                                                                             |
|-----------------------------------------------------------------------------------------------------------------------------------------------------------------------------------------------------------------------------------------------------------------------------------------------------------------------------|-----------------------------------------------------------------------------------------------------------------------------------------------------------------------------------------------------------------------------------------------------------------------------------------------------------------------------------------------------------------------------------------------------------------------------------------------------------------------------------------------------------------------------------------------------------------------------------------------------------------------------------------------------------------------------------------------------------------------------------------------------------------------------------------------------------------------------------------------------|-------------------------------------------------------------------------------------------------------------------------------------------------------------------------------------------------------------------------------------------------------------|
| <p>performs 50% or more of subtasks</p> <p>5. Maximal assistance—Weight-bearing support (including lifting limbs) by 2+ helpers—OR—Weight-bearing support for more than 50% of subtasks</p> <p>6. Total dependence—Full performance by others during all episodes</p> <p>7. Activity did not occur during entire period</p> | <p>performs 50% or more of subtasks</p> <p>5. Maximal assistance—Weight-bearing support (including lifting limbs) by 2+ helpers—OR—Weight-bearing support for more than 50% of subtasks</p> <p>6. Total dependence—Full performance by others during all episodes</p> <p>7. Activity did not occur during entire period</p>                                                                                                                                                                                                                                                                                                                                                                                                                                                                                                                         |                                                                                                                                                                                                                                                             |
|                                                                                                                                                                                                                                                                                                                             | <p>c) Dressing upper body—How dresses and undresses (street clothes, underwear) above the waist, including prostheses, orthotics, fasteners, pullovers, etc.</p> <p>0. Independent—No physical assistance, set-up, or supervision in any episode</p> <p>1. Independent, set-up help only—Article or device provided or placed within reach, no physical assistance or supervision in any episode</p> <p>2. Supervision—Oversight / cueing</p> <p>3. Limited assistance—Guided manoeuvring of limbs, physical guidance without taking weight</p> <p>4. Extensive assistance—Weight-bearing support (including lifting limbs) by 1 helper where person still performs 50% or more of subtasks</p> <p>5. Maximal assistance—Weight-bearing support (including lifting limbs) by 2+ helpers—OR—Weight-bearing support for more than 50% of subtasks</p> | <p>c) Dressing upper body—How dresses and undresses (street clothes, underwear) above the waist, including prostheses, orthotics, fasteners, pullovers, etc.</p> <p>0. Independent or set-up help only</p> <p>1. Supervision or any physical assistance</p> |

1  
2  
3  
4  
5  
6  
7  
8  
9  
10  
11  
12  
13  
14  
15  
16  
17  
18  
19  
20  
21  
22  
23  
24  
25  
26  
27  
28  
29  
30  
31  
32  
33  
34  
35  
36  
37  
38  
39  
40  
41  
42  
43  
44  
45  
46  
47

|  |                                                                                                                                                                                                                                                                                                                                                                                                                                                                                                                                                                                                                                                                                                                                                                                                                                                                                                                                                                                                          |                                                                                                                                                                                                                                                                                  |
|--|----------------------------------------------------------------------------------------------------------------------------------------------------------------------------------------------------------------------------------------------------------------------------------------------------------------------------------------------------------------------------------------------------------------------------------------------------------------------------------------------------------------------------------------------------------------------------------------------------------------------------------------------------------------------------------------------------------------------------------------------------------------------------------------------------------------------------------------------------------------------------------------------------------------------------------------------------------------------------------------------------------|----------------------------------------------------------------------------------------------------------------------------------------------------------------------------------------------------------------------------------------------------------------------------------|
|  | <p>6. Total dependence—Full performance by others during all episodes</p> <p>7. Activity did not occur during entire period</p>                                                                                                                                                                                                                                                                                                                                                                                                                                                                                                                                                                                                                                                                                                                                                                                                                                                                          |                                                                                                                                                                                                                                                                                  |
|  | <p>d) Dressing lower body—How dresses and undresses (street clothes, underwear) from the waist down including prostheses, orthotics, belts, pants, skirts, shoes, fasteners, etc.</p> <p>0. Independent—No physical assistance, set-up, or supervision in any episode</p> <p>1. Independent, set-up help only—Article or device provided or placed within reach, no physical assistance or supervision in any episode</p> <p>2. Supervision—Oversight / cueing</p> <p>3. Limited assistance—Guided manoeuvring of limbs, physical guidance without taking weight</p> <p>4. Extensive assistance—Weight-bearing support (including lifting limbs) by 1 helper where person still performs 50% or more of subtasks</p> <p>5. Maximal assistance—Weight-bearing support (including lifting limbs) by 2+ helpers—OR—Weight-bearing support for more than 50% of subtasks</p> <p>6. Total dependence—Full performance by others during all episodes</p> <p>7. Activity did not occur during entire period</p> | <p>d) Dressing lower body—How dresses and undresses (street clothes, underwear) from the waist down including prostheses, orthotics, belts, pants, skirts, shoes, fasteners, etc.</p> <p>0. Independent or set-up help only</p> <p>1. Supervision or any physical assistance</p> |

# BMJ Open

## Relevance of assessment items in community paramedicine home visit programmes: results of a modified Delphi study

|                                 |                                                                                                                                                                                                                                                                                                                                                                                                                                                                                                                                                                                                                                                                                                             |
|---------------------------------|-------------------------------------------------------------------------------------------------------------------------------------------------------------------------------------------------------------------------------------------------------------------------------------------------------------------------------------------------------------------------------------------------------------------------------------------------------------------------------------------------------------------------------------------------------------------------------------------------------------------------------------------------------------------------------------------------------------|
| Journal:                        | <i>BMJ Open</i>                                                                                                                                                                                                                                                                                                                                                                                                                                                                                                                                                                                                                                                                                             |
| Manuscript ID                   | bmjopen-2020-048504.R1                                                                                                                                                                                                                                                                                                                                                                                                                                                                                                                                                                                                                                                                                      |
| Article Type:                   | Original research                                                                                                                                                                                                                                                                                                                                                                                                                                                                                                                                                                                                                                                                                           |
| Date Submitted by the Author:   | 12-May-2021                                                                                                                                                                                                                                                                                                                                                                                                                                                                                                                                                                                                                                                                                                 |
| Complete List of Authors:       | Leyenaar, Matthew; McMaster University; Prince Edward Island Department of Health and Wellness, Emergency Health Services<br>Allana, Amir; University of Toronto Faculty of Medicine, Institute of Health Policy Management & Evaluation<br>Sinha, Samir ; Sinai Health System, Geriatric Medicine; University of Toronto Faculty of Medicine<br>Nolan, Michael; County of Renfrew, Paramedic Service<br>Agarwal, Gina; McMaster University, Family Medicine<br>Tavares, Walter; University of Toronto Faculty of Medicine, The Wilson Centre and Post MD Education; University of Toronto Faculty of Medicine, Institute of Health Policy Management & Evaluation<br>Costa, Andrew P ; McMaster University |
| <b>Primary Subject Heading</b>: | Health services research                                                                                                                                                                                                                                                                                                                                                                                                                                                                                                                                                                                                                                                                                    |
| Secondary Subject Heading:      | Emergency medicine                                                                                                                                                                                                                                                                                                                                                                                                                                                                                                                                                                                                                                                                                          |
| Keywords:                       | ACCIDENT & EMERGENCY MEDICINE, PREVENTIVE MEDICINE, PRIMARY CARE, HEALTH SERVICES ADMINISTRATION & MANAGEMENT, Protocols & guidelines < HEALTH SERVICES ADMINISTRATION & MANAGEMENT, STATISTICS & RESEARCH METHODS                                                                                                                                                                                                                                                                                                                                                                                                                                                                                          |
|                                 |                                                                                                                                                                                                                                                                                                                                                                                                                                                                                                                                                                                                                                                                                                             |

SCHOLARONE™  
Manuscripts



I, the Submitting Author has the right to grant and does grant on behalf of all authors of the Work (as defined in the below author licence), an exclusive licence and/or a non-exclusive licence for contributions from authors who are: i) UK Crown employees; ii) where BMJ has agreed a CC-BY licence shall apply, and/or iii) in accordance with the terms applicable for US Federal Government officers or employees acting as part of their official duties; on a worldwide, perpetual, irrevocable, royalty-free basis to BMJ Publishing Group Ltd ("BMJ") its licensees and where the relevant Journal is co-owned by BMJ to the co-owners of the Journal, to publish the Work in this journal and any other BMJ products and to exploit all rights, as set out in our [licence](#).

The Submitting Author accepts and understands that any supply made under these terms is made by BMJ to the Submitting Author unless you are acting as an employee on behalf of your employer or a postgraduate student of an affiliated institution which is paying any applicable article publishing charge ("APC") for Open Access articles. Where the Submitting Author wishes to make the Work available on an Open Access basis (and intends to pay the relevant APC), the terms of reuse of such Open Access shall be governed by a Creative Commons licence – details of these licences and which [Creative Commons](#) licence will apply to this Work are set out in our licence referred to above.

Other than as permitted in any relevant BMJ Author's Self Archiving Policies, I confirm this Work has not been accepted for publication elsewhere, is not being considered for publication elsewhere and does not duplicate material already published. I confirm all authors consent to publication of this Work and authorise the granting of this licence.

## Relevance of assessment items in community paramedicine home visit programmes: results of a modified Delphi study

### Author List: first name, last name, credentials

Matthew S Leyenaar, PhD

Amir Allana, BAsC

Samir K Sinha, MD DPhil

Michael Nolan, MA

Gina Agarwal, MBBS PhD

Walter Tavares, PhD

Andrew P Costa, PhD

### Author Affiliations:

MSL, APC, GA: Department of Health Research Methods, Evidence, and Impact, McMaster University

MSL, SKS, MN: The Ontario Community Paramedicine Secretariat

MSL: The Department of Health and Wellness, Government of Prince Edward Island

AA: Institute of Health Policy, Management and Evaluation, Dalla Lana School of Public Health, University of Toronto.

MN: County of Renfrew Paramedic Service

GA: Department of Family Medicine, McMaster University

WT: The Wilson Centre and Post MD Education, Institute of Health Policy, Management and Evaluation, University of Toronto and University Health Network. York Region Paramedic and Senior Services

WT, SKS: Department of Medicine, University of Toronto

### Corresponding Author:

Matthew S Leyenaar leyenam@mcmaster.ca

### Running Title: Relevant assessment in Community Paramedicine

**Keywords:** Emergency Medical Services, Community Paramedic, Care planning, Modified Delphi method

**Word Count: 3309**

### Author Contributions:

MSL and APC conceived the study. MSL and APC developed the surveys, hosted the meeting, and consolidated the findings. MSL and AA prepared the first draft of the manuscript and collaborated on revisions. MSL, AA, MN, SKS, GA, WT, and APC contributed to the design and methodology of this study and to the writing and critical editing of this manuscript.

### Conflict of Interests:

The authors declare no conflicts of interest

### Funding Sources/Disclosures:

This research received no specific grant from any funding agency in the public, commercial or not-for-profit sectors. MSL has received funding for research drawing on this study from the Canadian Frailty Network, Mitacs Accelerate Internship Program, CIHR, and the Hamilton Niagara Haldimand Brant Local Health Integration Network (formerly the Hamilton Niagara Haldimand Brant Community Care Access Centre).

1  
2  
3  
4  
5  
6  
7  
8  
9  
10  
11  
12  
13  
14  
15  
16  
17  
18  
19  
20  
21  
22  
23  
24  
25  
26  
27  
28  
29  
30  
31  
32  
33  
34  
35  
36  
37  
38  
39  
40  
41  
42  
43  
44  
45  
46  
47  
48  
49  
50  
51  
52  
53  
54  
55  
56  
57  
58  
59  
60

**Data availability statement:** Summarized questionnaire responses are available on request.

For peer review only

## ABSTRACT

### OBJECTIVE

Guidelines for a structured assessment in community paramedicine home visit programmes have not been established and evidence to inform their creation is lacking. We sought to investigate the relevance of assessment items to the practice of community paramedics according to a pre-established clarity-utility matrix.

### DESIGN

We designed a modified-Delphi study consisting of predetermined thresholds for achieving consensus, number of rounds of for scoring items, a defined meeting and discussion process, and a sample of participants that was purposefully representative.

### SETTING & PARTICIPANTS

We established a panel of 26 community paramedics representing 20 municipal paramedic services in Ontario, Canada. The sample represented a majority of paramedic services within the province that were operating a community paramedicine home visit program.

### MEASURES

Drawing from a bank of standardized assessment items grouped according to domains aligned with the International Classification on Functioning, Disability, and Health taxonomy, 64 previously pilot-tested assessment items were scored according to their clarity (being free from ambiguity and easy to understand) and utility (being valued in care planning or case management activities). Assessment items covered a broad range of health, social, and environmental domains. To conclude scoring rounds, assessment items that did not achieve consensus for relevance to assessment practices were discussed amongst participants with opportunities to modify assessment items for subsequent rounds of scoring.

### RESULTS

Resulting from the first round of scoring, 54 assessment items were identified as being relevant to assessment practices and 3 assessment items were removed from subsequent rounds. The remaining 7 assessment items were modified, with some parts removed from the final items that achieved consensus in the final rounds of scoring.

### CONCLUSION

A broadly representative panel of community paramedics identified consensus for 61 assessment items that could be included in a structured, multi-domain, assessment instrument for guiding practice in community paramedicine home visit programmes.

### STRENGTHS AND LIMITATIONS OF THIS STUDY

- A broadly representative panel of frontline community paramedics participated in a multi-round process to find consensus
- Community paramedics were able to use a utility-clarity matrix to determine the relevance of assessment items included in a standardize assessment instrument designed for home visiting programmes
- The modified Delphi methodology enabled frontline community paramedics to navigate the tension that exists between standardization and adaptation to local and contextual criteria
- By investigating the relevance of assessment items in community paramedicine home visit programmes, the findings can contribute evidence towards clinical utility and validation of a standardized assessment instrument that is fit-for-purpose.



## Relevance of assessment items in community paramedicine home visit programmes: results of a modified Delphi study

### INTRODUCTION

Paramedics, as mobile healthcare providers with limited access to diagnostic tools, use social and environmental observation, physical examination and oral history-taking to understand patient condition and make treatment decisions (1). In high-acuity emergencies, paramedics must quickly identify and treat threats to life and limb (1). In lower acuity situations, paramedics must consider multiple pathologies that may be contributing to a patient's condition through a more comprehensive and detailed problem-based approach (2). In all cases, paramedics must assess patients and the surrounding environment thoroughly to deliver appropriate patient care and maintain safety (1,3).

A structured process for patient assessment is common in paramedicine and other emergency settings (1,4). Structured assessment processes have been identified as important to guiding practice, reducing errors or adverse events, and contributing to accuracy requirements that can improve patient care in many settings (1,5–8). Structured frameworks for assessments might include mnemonics or other tools or prompts to help ensure completeness and that findings are relevant to clinical practice (5,8). Common terminology and standardized documentation are helpful when communicating assessment findings with other members of the care team (7).

Community paramedicine is an emerging area of paramedic practice where paramedics with broadened skillsets provide low-acuity and preventative care, often collaborating with other members of patients' care teams in community settings (9,10). In community paramedicine home visit programmes, paramedics visit patients at home to identify, treat, and conduct referrals for emerging health and social needs (10,11). This represents an extension of low acuity paramedic practice, with new aspects of patient assessment required for improved care integration, care planning and case management (10,12). While consistent, structured processes for patient assessment in paramedicine have long been in place (1), how they have been re-directed or altered for application in community paramedicine settings is not clear. Broad guidelines for structuring patient assessment in community paramedicine settings have not been established and concerns have been identified about potentially inconsistent assessment practices within and across regional jurisdictions (11,12).

The purpose of the Community Paramedicine Assessment Matters (CPAM) study was to explore consensus on the most relevant assessment items that should be included in structured, multi-dimensional, comprehensive, patient assessment practices for community paramedicine home visit programmes. Such assessment practices should capture the health, social, and environmental considerations needed to direct community paramedic care planning and case management activities. In the absence of other sources of evidence, we expected that expert opinion would provide the best source of information (13) needed to identify assessment items that might provide clarity and utility in clinical practice and determine what matters during an assessment conducted by a community paramedic in a community paramedicine home visit program.

### METHODS

#### *Study Design*

A modified Delphi process was used consisting of multiple iterations of online questionnaires and web-based discussions with an expert panel of community paramedics from one Canadian province. The questionnaires asked participants to evaluate individual assessment items for relevance to practice.

#### *Preceding instrumentation*

Assessment items (as grouped according to assessment domains) were derived from an instrument that had been pilot tested in multiple sites through the CARPE Study (ISRCTN 58273216). Results of the CARPE Study have been published here:

1  
2  
3  
4 Leyenaar MS, McLeod B, Jones A, Brousseau AA, Mercier E, Strum RP, Nolan M, Sinha SK,  
5 Agarwal G, Tavares W, Costa AP. Paramedics assessing patients with complex comorbidities in  
6 community settings: results from the CARPE study. CJEM. 2021 Aug 17. doi: 10.1007/s43678-021-  
7 00153-4. Epub ahead of print. PMID: 34403118. Derivation of the CARPE assessment instrument  
8 included a literature review, preliminary modified Delphi study, and environmental scan of existing  
9 practices (10,11,14). The CARPE assessment instrument was constructed in accordance with other  
10 standardized assessment instruments that have been created by interRAI—an international group of  
11 researchers and clinicians (7). interRAI instruments are designed as an integrated assessment system to  
12 cover the continuum of care settings, have been implemented in over 30 countries, and align with the  
13 taxonomies established by the World Health Organisation’s International Classification on Functioning,  
14 Disability, and Health (7,11,15–17). The CARPE assessment instrument included 64 assessment items  
15 grouped according to 14 assessment domains covering an array of health, social, and environmental  
16 factors. Between each iteration of questionnaires, web-based discussions were hosted to discuss results.  
17  
18  
19

### 20 21 *Ethics*

22 The Hamilton Integrated Research Ethics Board approved the study.

### 23 24 *Patient and public involvement*

25 Patients and members of the public were not involved in this study.

### 26 27 *Recruitment and study orientation*

28 All paramedic services in Ontario providing home visit programmes, identified in a 2019 provincial  
29 report on community paramedicine (18), were invited to participate in the study. Each paramedic service  
30 was allowed a maximum of three participants. A minimum of 24 participants with representation from at  
31 least 50% of Ontario paramedic services with home visit programmes was considered to be  
32 representative. We could allow for a maximum of 36 participants due to logistics and budget.  
33 Recruitment of participants was facilitated by the Ontario Community Paramedicine Secretariat. Selection  
34 of participants (within the minimum and maximum number) was based on maximizing the number of  
35 representative services.  
36  
37

38 To participate, community paramedics needed to be certified as critical, advanced, or primary care  
39 and be working in a community paramedicine home visit program that included patient assessment as part  
40 of their regular clinical practice. Exclusion criteria were defined for paramedics who had an  
41 organizational rank of commander or higher unless they could demonstrate that patient assessment was a  
42 regular component of their assigned duties. Paramedics in acting or temporary administrative roles, or  
43 those who assume those roles over the course of the study were not be excluded.  
44

45 Interested participants were invited to participate in an information and orientation session where they  
46 were presented with an outline of the aims and structure for the study. Prior to beginning the first round  
47 of scoring, participants provided written consent. Participants received gift cards of increasing value for  
48 each round that they participated in.  
49

### 50 51 *Finding Consensus*

52 We investigated two dimensions of relevance—clarity and utility—during each round of the modified  
53 Delphi process. Clarity of an item described the ease to which the information provided through an  
54 assessment item could be understood by the community paramedic and was free from ambiguity. Utility  
55 of an assessment item reflected whether or not the item was considered to be useful to the community  
56  
57  
58

1  
2  
3 paramedic's role in care planning or case management. The question of utility investigated whether or  
4 not actionable information would be generated by an assessment item. The rationale for including two  
5 dimensions to relevance was to establish a relationship between any individual assessment item included  
6 in an assessment instrument and the practice of assessment to inform care planning and case management  
7 activities. For example, if an assessment item is clearly understood (high clarity) but does not provide  
8 actionable information (low utility) then it is not likely contributing to patient assessment. Alternatively,  
9 if an assessment item cannot be clearly understood (low clarity), even if it is determined to be actionable  
10 (high utility), then how it is acted upon may vary from one situation to another. If an item is neither  
11 clearly understood (low clarity) nor actionable (low utility), then it should not be considered as relevant to  
12 assessment practice. For any assessment item to be considered relevant, it would need to satisfy the  
13 conditions according to the two dimensions identified (illustrated in Figure 1).  
14  
15

16 For an item to reach consensus, two-thirds (66.7%) of responses needed to either fall in the relevant  
17 or not relevant portions of the matrix illustrated in Figure 1. Assessment items were grouped according to  
18 assessment domains. If no items within a domain were identified as being relevant, the domain was  
19 removed from subsequent rounds. Secondary analysis was conducted to review assessment items where  
20 greater than one-third (33.3%) of responses were within the central variable of either of the individual  
21 dimensions (somewhat useful or moderately understandable).  
22  
23

### 24 *Delphi Rounds*

25 To help prevent participant fatigue and ensure ongoing participation, it was decided at the outset of  
26 the study that a maximum of three rounds of scoring would be used. Each round began with an online  
27 questionnaire to determine the clarity and utility of each assessment item by the participating community  
28 paramedics. Participants reviewed each assessment item and scored it on two separate 3-point Likert  
29 scales (as illustrated in Figure 1) to determine its relevance. After the first round, participants also  
30 received the proportion of responses according to each dimension of relevance from the preceding round.  
31 Each questionnaire presented assessment items grouped in domains and ordered in the sequence as they  
32 appeared in the CARPE Assessment instrument. Questionnaires were pilot tested with a minimum of  
33 three participants before each round to determine the approximate length of time needed for completion,  
34 and to refine the questionnaire if necessary. Participants were sent a web-link to the questionnaire at the  
35 beginning of each round of scoring. Each round of scoring was open for two weeks with reminder emails  
36 sent between 48h and 72h prior to closing of each round.  
37  
38

39 Between each round of scoring a web-conferencing meeting was held to discuss results of the  
40 preceding round and introduce the subsequent round. Results were summarized for assessment items that  
41 were classified as either relevant, not relevant, or consensus not reached. In the cases where consensus  
42 was not reached on the relevance of assessment items, discussions included characteristics of the  
43 assessment items that were not actionable in care planning activities or that were not clear. If participants  
44 indicated that an assessment item was difficult to understand, discussions explored how it could be  
45 modified (condensed or expanded) according to the context of assessment practices, for the next round of  
46 scoring. For example, if an assessment item included multiple parts and multiple levels of response, it  
47 could be modified to separate the multiple parts into individual items or to reduce the multiple levels of  
48 response to dichotomous levels. Alternatively, if an assessment item included only dichotomous levels of  
49 response and participants felt that more granularity was required, the item could be modified to provide  
50 multiple levels of response. Any modified multi-part assessment items were reorganized to gather sub-  
51 parts into new multi-part assessment items where applicable. Each web conference was recorded and  
52 shared with participants who were not able to attend. At conclusion of the three rounds of scoring,  
53 assessment items would be classified as either relevant, not relevant, modified, or consensus not reached.  
54  
55  
56  
57  
58  
59  
60

## RESULTS

### *Panel & participation*

Twenty-six community paramedics from twenty paramedic services agreed to participate in the study. All twenty-six participated in the first survey. Sixteen (62%) participated in the first meeting (12 in real-time, 4 by viewing the recording). Twenty (77%) participated in the second survey. Eleven (42%) participants joined the second meeting. The final survey was completed by 24 (92%) participants. Table 1 provides a summary of participation.

### *Rounds*

The first round presented a total of 64 assessment items grouped according to 14 assessment domains (See Figure 2 and Table 2). No items had responses indicating that they were not relevant to practice but one domain (which included three items) did not yield any responses that achieved consensus for relevance. Fifty-four items from eight domains met criteria for relevance to practice. The remaining seven items were presented to participants for discussion at the meeting to concluded round one. Secondary analysis identified 25 assessment items where more than one-third of responses were within the central variable in one of the individual dimensions of relevance, clarity or utility.

| Study Stage           | Participation<br>(including watching<br>recorded meeting) | %   |
|-----------------------|-----------------------------------------------------------|-----|
| Round 1 Questionnaire | 26                                                        | 100 |
| Round 1 Meeting       | 16 (4)                                                    | 62  |
| Round 2 Questionnaire | 20                                                        | 77  |
| Round 2 Meeting       | 11 (5)                                                    | 42  |
| Round 3 Questionnaire | 24                                                        | 92  |

Table 2: The number of assessment items according to their respective assessment domains presented to participants for rating in each round.

| Assessment Domain                          | Number of Assessment Items, Round #1 | Number of Modified Assessment Items, Round #2 | Number of Modified Assessment Items, Round #3 |
|--------------------------------------------|--------------------------------------|-----------------------------------------------|-----------------------------------------------|
| Living Arrangement                         | 3                                    |                                               |                                               |
| Cognition                                  | 4                                    |                                               |                                               |
| Communication & Vision                     | 4                                    |                                               |                                               |
| Mood                                       | 2                                    |                                               |                                               |
| Psychosocial Well-Being & Social Isolation | 13                                   |                                               |                                               |
| Functional Status                          | 7                                    | 19                                            | 19                                            |
| Continence                                 | 3                                    |                                               |                                               |
| Disease Diagnoses                          | 1                                    | 5                                             |                                               |
| Health Conditions                          | 9                                    | 22                                            | 3                                             |
| Nutritional Status                         | 2                                    |                                               |                                               |
| Medications                                | 5                                    |                                               |                                               |
| Treatments & Procedures                    | 6                                    |                                               |                                               |
| Home Environment                           | 4                                    |                                               |                                               |
| Personal Goals                             | 1                                    |                                               |                                               |
| TOTAL                                      | 64                                   | 46                                            | 22                                            |

To accommodate the time constraints necessary to discuss the number of assessment items, the discussion was focused specifically on the seven assessment items that did not achieve consensus. Given that many of these assessment items had multiple parts with multiple categories of potential findings, discussion included options for reducing item complexity; either by reducing categories for responses or by separating multi-part items into single part items. The meeting participants suggested that multi-level responses were more important. As a result, the questionnaire for the second round re-organized the seven multi-part items into 46 single-part items (See Table 3 and Supplemental Table 1 for examples).

Resulting from the second-round questionnaire, 22 of the modified assessment items achieved consensus on relevance (See Figure 2). Secondary analysis identified that seven assessment items had one-third of responses within the central variable of an individual dimension of relevance. Discussion at the second-round meeting focused on of assessment items that could have simplified response categories. The outcome from the second-round meeting was the removal of two modified parts and the re-organization of the remaining 22 assessment items into simplified response categories (See Table 3). The modified assessment items from the second (and third) round were reorganized into seven items representing edited versions of the seven items that did not achieve consensus after the first round.

In the third and final round of scoring, one modified assessment item did not achieve consensus on relevance while the remaining 21 did (See Figure 2). The outcome from the three rounds of scoring meant that 54 original assessment items and 7 modified assessment items were identified as being relevant to assessments in community paramedicine home visit programmes. In the modification process, three parts of assessment items included in the original set of assessment items were removed.

1  
2  
3  
4  
5  
6  
7  
8  
9  
10  
11  
12  
13  
14  
15  
16  
17  
18  
19  
20  
21  
22  
23  
24  
25  
26  
27  
28  
29  
30  
31  
32  
33  
34  
35  
36  
37  
38  
39  
40  
41  
42  
43  
44  
45  
46  
47  
48  
49  
50  
51  
52  
53  
54  
55  
56  
57  
58  
59  
60

| Assessment item presented in Round #1                                                                                                                                                                                          | Modification of assessment item presented in Round #2                                                                                                                            | Modification of assessment item presented in Round #3                                                                                   | Final re-organization following scoring                                                                                                                                                                                           |
|--------------------------------------------------------------------------------------------------------------------------------------------------------------------------------------------------------------------------------|----------------------------------------------------------------------------------------------------------------------------------------------------------------------------------|-----------------------------------------------------------------------------------------------------------------------------------------|-----------------------------------------------------------------------------------------------------------------------------------------------------------------------------------------------------------------------------------|
| Assessment of ability to perform activities of daily living (ADLs). Assessment item includes 11 specific ADLs to assess and provides 8 response categories for levels of dependence from fully independent to fully dependent. | Each specific ADL is presented separately to participants while maintaining the original response categories for levels of dependence from fully independent to fully dependent. | Each specific ADL is presented separately to participants with response categories simplified to either independent or not independent. | Those ADLs that were scored as being relevant were reorganized into one new assessment item including 10 ADLs with response categories of independent or not independent. One modified assessment item did not achieve consensus. |
| Presented as one assessment item.                                                                                                                                                                                              | Presented as 11 modified items.                                                                                                                                                  | Presented as 11 modified items                                                                                                          | Presented as 1 reorganized item identified as being relevant and 1 modified item as not achieving consensus.                                                                                                                      |

Further details on modifications are presented in Supplemental Table 1.

## DISCUSSION

Community paramedicine home visit programmes represent a relatively new area of practice for paramedics that re-direct their skills towards preventive and integrated patient care (19). Where assessment practices and guidelines have been established for emergency response, assessment practices and guidelines for community paramedics are still being established (10,20,21). Through taking a consensus-based approach with a panel of community paramedics from a cross-section of paramedic services, this study provides new information towards the standardization of assessment practices in community paramedicine home visit programmes.

### *Implications for clinical practice*

The relevance of assessment items in domains such as home environment, functional status, and psychosocial wellbeing expand on existing paramedic assessment practices such as physical examination and medical history-taking. This reflects the underlying values and purpose of community paramedicine as a patient-centered approach that equally prioritizes the biological, psychological, and social determinants of health (12,19,22). Such comprehensive assessment practices are enabled by the low-acuity and less time-sensitive conditions in which community paramedic home visit programmes operate, as opposed to the norms of emergency response paramedicine where assessment focuses on the most emergent short-term medical needs (1).

Paramedic assessment in emergency response is geared towards guiding immediate treatment decisions and relaying pertinent information to emergency department staff, both examples of short-term care planning and treatment (1,2). In contrast, community paramedicine assessments are likely to identify medium- and long-term care needs. The breadth and depth of assessment items that the expert panel considered relevant to practice suggests that the community paramedics who participated recognize their

1  
2  
3 ability to take action on a range of patient needs that would necessitate the involvement of other  
4 healthcare providers from disciplines such as family medicine, occupational therapy, social work,  
5 pharmacy, and community nursing. Team-based delivery of care introduces a higher level of complexity  
6 and uncertainty to assessment practices. How a community paramedic's assessment informs their own  
7 care planning in comparison to its utility to a larger care team is unclear. It is also unclear to what extent  
8 assessment may be duplicated by other care providers, and whether or not they would be in agreement  
9 with the community paramedic's assessment. The degree of integration (functional and professional)  
10 between different members of a patient's care team, which community paramedics are a part of, remains  
11 an ongoing area of research in integrated care (23).

12  
13 Previously published studies investigating assessment practices by community paramedics have  
14 considered different components of the assessment process (10,11,14). Principles of patient assessment  
15 both in paramedicine and other health settings reflect how the assessment process is a guiding component  
16 of any patient care activity (1,6). Assessments should gather the clinical and social information about  
17 patient condition (1,6,7,24). Asking community paramedics about the relevance of assessment items  
18 reveals what parts of an assessment process inform the delivery of care in their practice setting and is  
19 informative to how practice has evolved from the emergency setting. The implications from this study  
20 can include identifying remaining barriers or inconsistencies to community paramedic practice still need  
21 to be addressed. Paramedics are well situated to identify these challenges.

### 22 23 *Strengths*

24 In the absence of evidence about community paramedic patient assessment practices, it serves well  
25 to identify what community paramedics identify as relevant to the care that they are delivering—  
26 particularly when the delivery of care is part of an expanded role or extended scope of practice. Asking an  
27 expert panel is consistent with best practice when a definite evidence base is lacking. The methodology  
28 followed through our investigation is consistent with recommendations for modified Delphi studies (25).  
29 Panel selection was outlined in a reproducible way. Consensus was defined a priori. The number of  
30 rounds was specified. Criteria were established to guide discussions.

31  
32 Criticism of modified Delphi studies is often centred around unclear processes, a biased sampling  
33 process for establishing participation, or not having clearly established goals (25,26). We established a  
34 panel that was broadly representative of practice in Ontario. The process that was outlined and followed  
35 suggests that the clarity-utility matrix we established provided a functional method to define relevance of  
36 assessment items to assessment practices. The clarity-utility matrix could be broadly applied to future  
37 studies exploring paramedic practice or assessment practices in other settings.

### 38 39 *Limitations*

40 This study was limited to the Ontario context. While participation levels were adequate across all  
41 rounds of scoring and options were available for participants to view recorded meeting proceedings, we  
42 did not exclude participants if they were unable to complete one of the scoring rounds or join one of the  
43 meetings. For example, it is likely that some participants were less informed entering the third round than  
44 others. The structure of the questionnaires and each paramedic's familiarity with their individual  
45 assessment practices should have been adequate in such circumstances and still provide meaningful  
46 insight because individual community paramedic practices can vary widely across different health  
47 systems (9,22). Repeating this study in other jurisdictions may yield different or conflicting results.  
48 However, given that community paramedicine home visit programmes are becoming more ubiquitous, the  
49 results of this study can contribute to establishing assessment practice guidelines across a wider range of  
50 jurisdictions.

51  
52 We did not examine how community paramedic assessment items compare with those used by  
53 other members of the patient care team, and our Delphi panel consisted only of paramedics. Given the  
54 multi-disciplinary nature of community paramedicine, other work has explored some of these questions  
55 (14). It will be useful to know to what extent community paramedic assessment items reflect best practice  
56 from other fields of health and social care.

### *Future Work*

Derivation of an evidence-informed standardized assessment instrument that is fit-for-purpose in community paramedicine programmes can draw from the results of this study, the CARPE Study, and the studies that informed development of the CARPE assessment instrument. It is expected that a refined Community Paramedicine Contact Assessment instrument will be published by interRAI in the near future. Future work that expands the evaluation of the instrument, lending more evidence of its reliability, validity, sensitivity, and clinical utility will further contribute to wider efforts in a relatively nascent field with opportunity for expanded program evaluation and development of quality indicators.

Patient-centred care includes reducing barriers to access and better care coordination, consistent with aims of community paramedicine programmes. Future studies should also examine the patient perspective on what they feel is relevant to be included in a structured assessment process.

As the evidence base grows for community paramedicine assessment practices it will lead to a level of standardization and consistency across jurisdictions and programmes. Future work could then examine the efficacy of these assessment practices by examining process- and outcome-based indicators such as access to care, service utilization, and measures of patient health. The development of practice guidelines in community paramedicine will also help develop processes for quality improvement and performance measurement. Evaluating consistent assessment practices in community paramedicine home visit programmes presents the opportunity to measure changes in patient condition over time and further improve case management.

### CONCLUSION

Uptake of assessment guidelines that are broadly applicable to differing community paramedicine programmes is an important step in the growth, evolution, and emergence of community paramedicine. By establishing consensus on the relevance of specific assessment items to detect health and social factors that drive functional decline, social isolation, loss of independence, and ultimately repeated emergency calls, we believe that guidelines for assessment in community paramedicine programmes will be strengthened, with improved case-finding and care-planning expected to follow.



## REFERENCES:

1. Colbeck MA, Maria S, Eaton G, Campbell C, Batt AM, Caffey MR. International Examination and Synthesis of the Primary and Secondary Surveys in Paramedicine. *Irish J Paramed*. 2018;3(2):1–9.
2. Ambulance Victoria. Ambulance Victoria Patient Assessment Standards. 2019. p. 1–52.
3. Jensen JL, Croskerry P, Travers AH. Consensus on paramedic clinical decisions during high-acuity emergency calls: Results of a Canadian Delphi study. *Can J Emerg Med*. 2011;13(5):310–8.
4. Curtis K, Murphy M, Hoy S, Lewis MJ. The emergency nursing assessment process-A structured framework for a systematic approach. *Australas Emerg Nurs J*. 2009;12(4):130–6.
5. Munroe B, Curtis K, Considine J, Buckley T. The impact structured patient assessment frameworks have on patient care: An integrative review. *J Clin Nurs*. 2013;22(21–22):2991–3005.
6. Munroe B, Curtis K, Murphy M, Strachan L, Buckley T. HIRAID: An evidence-informed emergency nursing assessment framework. *Australas Emerg Nurs J* [Internet]. 2015;18(2):83–97. Available from: <http://dx.doi.org/10.1016/j.aenj.2015.02.001>
7. Gray LC, Berg K, Fries BE, Henrard J-CC, Hirdes JP, Steel K, et al. Sharing clinical information across care settings: the birth of an integrated assessment system. *BMC Health Serv Res* [Internet]. 2009;9(1):71. Available from: <http://bmchealthservres.biomedcentral.com/articles/10.1186/1472-6963-9-71>
8. Reynolds T, Thornicroft G, Abas M, Woods B, Hoe J, Leese M, et al. Camberwell Assessment of Need for the Elderly (CANE). Development, validity and reliability. *Br J Psychiatry*. 2000;176(MAY):444–52.
9. Chan J, Griffith LE, Costa AP, Leyenaar MS, Agarwal G. Community paramedicine: A systematic review of program descriptions and training. *CJEM* [Internet]. 2019;21(6):749–61. Available from: <https://doi.org/10.1017/cem.2019.14>
10. Leyenaar M, McLeod B, Chan J, Tavares W, Costa A, Agarwal G. A scoping study and qualitative assessment of care planning and case management in community paramedicine. *Irish J Paramed*. 2018;3(July):1–15.
11. Leyenaar MS, McLeod B, Penhearow S, Strum R, Brydges M, Mercier E, et al. What do community paramedics assess? An environmental scan and content analysis of patient assessment in community paramedicine. *CJEM Can J Emerg Med Care* [Internet]. 2019 [cited 2019 Aug 2]; Available from: <https://doi.org/10.1017/cem.2019.379>
12. Huang Y-H, Ma L, Sabljak LA, Puhala ZA. Development of sustainable community paramedicine programmes: a case study in Pennsylvania. *Emerg Med J* [Internet]. 2018 Jun 1 [cited 2019 Apr 13];35(6):372–8. Available from: <http://ovidsp.ovid.com/ovidweb.cgi?T=JS&PAGE=reference&D=med13&NEWS=N&AN=29666145>
13. Hsu C-C, Sandford BA. The Delphi Technique: Making Sense of Consensus. *Pract Assessment, Res Eval*. 2007;12:10.
14. Leyenaar MS, Strum RP, Batt AM, Sinha S, Nolan M, Agarwal G, et al. Examining consensus for a standardised patient assessment in community paramedicine home visits: A RAND/UCLA-modified Delphi Study. *BMJ Open*. 2019 Oct;9(10):e031956.
15. Heckman G, Gray L, Hirdes J. Addressing health care needs for frail seniors in Canada: the role of interRAI instruments. *Can Geriatr J*. 2013;3(1):8–16.
16. Berg K, Finne-Soveri H, Gray L, Henrard JC, Hirdes J, Ikegami N, et al. Relationship between interRAI HC and the ICF: opportunity for operationalizing the ICF. *BMC Health Serv Res* [Internet]. 2009 Dec 17 [cited 2018 Sep 12];9(1):47. Available from: <http://bmchealthservres.biomedcentral.com/articles/10.1186/1472-6963-9-47>
17. Carpenter I, Hirdes JP. Using interRAI assessment systems to measure and maintain quality of long-term care. 2013.
18. Leyenaar MS, Strum R, Haque M, Nolan M, Sinha SK, Ontario Community Paramedicine

- 1  
2  
3 Secretariat Steering Committee. Report on the Status of Community Paramedicine in Ontario  
4 [Internet]. 2019. Available from: <https://www.ontariocpsecretariat.ca/resources>  
5 19. O'Meara P, Stirling C, Ruest M. Community paramedicine model of care: an observational,  
6 ethnographic case study. *BMC Health Serv Res* [Internet]. 2016 Dec 2 [cited 2016 Oct  
7 26];16(1):39. Available from: <http://www.biomedcentral.com/1472-6963/16/39>  
8 20. O'Meara P. Community paramedics : a scoping review of their emergence and potential impact.  
9 *Int Paramed Pract*. 2014;4(1):5–12.  
10 21. Choi BY, Blumberg C, Williams K. Mobile Integrated Health Care and Community  
11 Paramedicine : An Emerging Emergency Medical Services Concept. *Ann Emerg Med* [Internet].  
12 2016;67(3):361–6. Available from: <http://dx.doi.org/10.1016/j.annemergmed.2015.06.005>  
13 22. Rasku T, Kaunonen M, Thyer E, Paavilainen E, Joronen K. The core components of Community  
14 Paramedicine - integrated care in primary care setting: a scoping review. *Scand J Caring Sci*  
15 [Internet]. 2019; Available from: <http://doi.wiley.com/10.1111/scs.12659>  
16 23. Valentijn PP, Boesveld IC, van der Klauw DM, Ruwaard D, Struijs JN, Molema JJW, et al.  
17 Towards a taxonomy for integrated care: A mixed-methods study. *Int J Integr Care*. 2015 Mar  
18 4;15(Jan-Mar 2015).  
19 24. Curtis K, Munroe B, Van C, Elphick TL. The implementation and usability of HIRAID, a  
20 structured approach to emergency nursing assessment. *Australas Emerg Care* [Internet].  
21 2020;23(1):62–70. Available from: <https://doi.org/10.1016/j.auec.2019.10.001>  
22 25. Diamond IR, Grant RC, Feldman BM, Pencharz PB, Ling SC, Moore AM, et al. Defining  
23 consensus: A systematic review recommends methodologic criteria for reporting of Delphi studies.  
24 *J Clin Epidemiol* [Internet]. 2014;67(4):401–9. Available from:  
25 <http://dx.doi.org/10.1016/j.jclinepi.2013.12.002>  
26 26. Jünger S, Payne SA, Brine J, Radbruch L, Brearley SG. Guidance on Conducting and REporting  
27 DELphi Studies (CREDES) in palliative care: Recommendations based on a methodological  
28 systematic review. *Palliat Med*. 2017;31(8):684–706.  
29  
30  
31  
32  
33  
34  
35  
36  
37  
38  
39  
40  
41  
42  
43  
44  
45  
46  
47  
48  
49  
50  
51  
52  
53  
54  
55  
56  
57  
58  
59  
60

## FIGURE CAPTIONS

Figure 1: Matrix of clarity and utility used to define relevance of assessment items

Figure 2: Illustration representing outcomes from each round of the study. Diamonds represent consensus for exclusion/removal of assessment items, ellipses represent consensus for relevance of assessment items.

For peer review only

|         |                 |   | Clarity            |                           |                         |
|---------|-----------------|---|--------------------|---------------------------|-------------------------|
|         |                 |   | Easy to Understand | Moderately Understandable | Difficult to Understand |
|         |                 |   | 3                  | 2                         | 1                       |
| Utility | Very Useful     | 3 | Relevant           | Relevant                  |                         |
|         | Somewhat Useful | 2 | Relevant           |                           | Not Relevant            |
|         | Not Useful      | 1 |                    | Not Relevant              | Not Relevant            |

Figure 1: Matrix of clarity and utility used to define relevance of assessment items

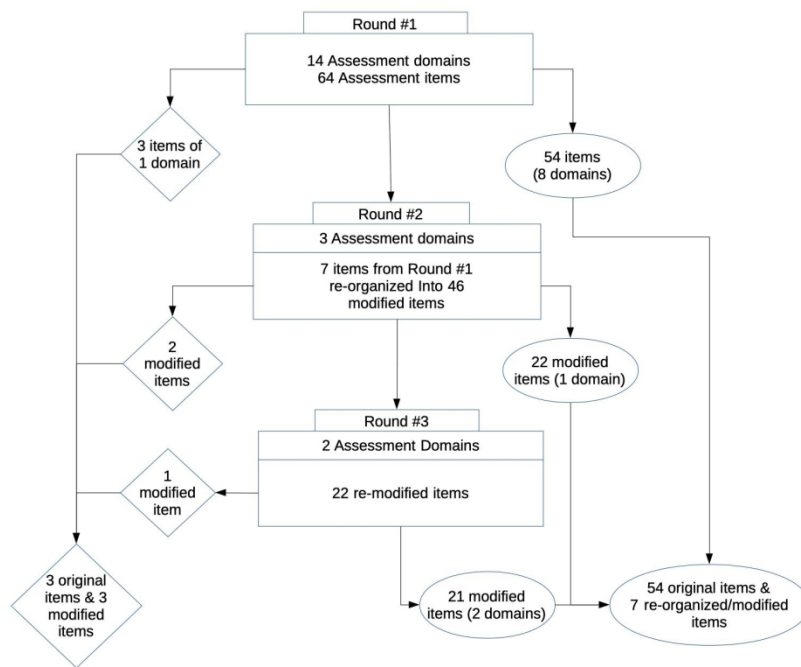

Figure 2: Illustration representing outcomes from each round of the study. Diamonds represent consensus for exclusion/removal of assessment items, ellipses represent consensus for relevance of assessment items.

420x296mm (113 x 113 DPI)

Supplement Table 1: Example of presentation and modification of an assessment item across rounds (Note: selected sub-parts included in Table for illustrative purposes. Reproduced with permission from interRAI Canada).

| Assessment item presented in Round #1                                                                                                                                                                                                                                                                                                                                                                                                                                                                                                                                                                                                                           | Modification of assessment item presented in Round #2                                                                                                                                                                                                                                                                                                                                                                                                                                                                                                                                                              | Modification of assessment item presented in Round #3                                                                                                                                                                                                                                                                                                                                                                                                                                                     |
|-----------------------------------------------------------------------------------------------------------------------------------------------------------------------------------------------------------------------------------------------------------------------------------------------------------------------------------------------------------------------------------------------------------------------------------------------------------------------------------------------------------------------------------------------------------------------------------------------------------------------------------------------------------------|--------------------------------------------------------------------------------------------------------------------------------------------------------------------------------------------------------------------------------------------------------------------------------------------------------------------------------------------------------------------------------------------------------------------------------------------------------------------------------------------------------------------------------------------------------------------------------------------------------------------|-----------------------------------------------------------------------------------------------------------------------------------------------------------------------------------------------------------------------------------------------------------------------------------------------------------------------------------------------------------------------------------------------------------------------------------------------------------------------------------------------------------|
|                                                                                                                                                                                                                                                                                                                                                                                                                                                                                                                                                                                                                                                                 | <p>Assessment should include determining a patient's <u>self-performance</u> of activities of daily living (ADLs). In your assessment, consider all episodes over 3-day period. Determine if all episodes are performed independently or if any episodes required supervision or assistance. To further explore these responses, we have divided the assessment item into separate ADLs. Please consider each of the following ADLs to include when assessing a patient for the first time, at a first visit:</p>                                                                                                  | <p>Assessment should include determining a patient's <u>self-performance</u> of activities of daily living (ADLs). In your assessment, consider all episodes over 3-day period. Determine if all episodes are performed independently or if any episodes required supervision or assistance. We have simplified responses to separate ADL assessment items to two possibilities. Please consider each of the following ADLs to include when assessing a patient for the first time, at a first visit.</p> |
| <p>Considering assessment of ability to perform activities of daily living (ADL). In each of the following areas, assessment determines what a patient's actual ability was over the 3-day period preceding the assessment. If all episodes are performed at the same level, score ADL at that level. If any episodes at level 6, and others less dependent, score ADL as a 5. Otherwise, focus on the three most dependent episodes [or all episodes if performed fewer than 3 times]. If most dependent episode is 1, score ADL as 1. If not, score ADL as least dependent of those episodes in range 2–5.</p> <p>a) Bathing—How takes a full-body bath /</p> | <p>a) Bathing—How takes a full-body bath / shower. Includes how transfers in and out of tub or shower AND how each part of body is bathed: arms, upper and lower legs, chest, abdomen, perineal area—<b>EXCLUDE WASHING OF BACK AND HAIR</b></p> <ol style="list-style-type: none"> <li>0. Independent—No physical assistance, set-up, or supervision in any episode</li> <li>1. Independent, set-up help only—Article or device provided or placed within reach, no physical assistance or supervision in any episode</li> <li>2. Supervision—Oversight / cueing</li> <li>3. Limited assistance—Guided</li> </ol> | <p>a) Bathing—How takes a full-body bath / shower. Includes how transfers in and out of tub or shower AND how each part of body is bathed: arms, upper and lower legs, chest, abdomen, perineal area—<b>EXCLUDE WASHING OF BACK AND HAIR</b></p> <ol style="list-style-type: none"> <li>0. Independent or set-up help only</li> <li>1. Supervision or any physical assistance</li> </ol>                                                                                                                  |

1  
2  
3  
4  
5  
6  
7  
8  
9  
10  
11  
12  
13  
14  
15  
16  
17  
18  
19  
20  
21  
22  
23  
24  
25  
26  
27  
28  
29  
30  
31  
32  
33  
34  
35  
36  
37  
38  
39  
40  
41  
42  
43  
44  
45  
46  
47

|                                                                                                                                                                                                                                                                                                                                                                                                                                                                                                                                                                                                                                                                                     |                                                                                                                                                                                                                                                                                                                                                                                                                                                                                                                                                                                                                                                                                              |                                                                                                                                                                                                                                                                                           |
|-------------------------------------------------------------------------------------------------------------------------------------------------------------------------------------------------------------------------------------------------------------------------------------------------------------------------------------------------------------------------------------------------------------------------------------------------------------------------------------------------------------------------------------------------------------------------------------------------------------------------------------------------------------------------------------|----------------------------------------------------------------------------------------------------------------------------------------------------------------------------------------------------------------------------------------------------------------------------------------------------------------------------------------------------------------------------------------------------------------------------------------------------------------------------------------------------------------------------------------------------------------------------------------------------------------------------------------------------------------------------------------------|-------------------------------------------------------------------------------------------------------------------------------------------------------------------------------------------------------------------------------------------------------------------------------------------|
| <p>shower. Includes how transfers in and out of tub or shower AND how each part of body is bathed: arms, upper and lower legs, chest, abdomen, perineal area—<b>EXCLUDE WASHING OF BACK AND HAIR</b></p> <p>b) Personal hygiene—How manages personal hygiene, including combing hair, brushing teeth, shaving, applying make-up, washing and drying face and hands—<b>EXCLUDE BATHS AND SHOWERS</b></p> <p>c) Dressing upper body—How dresses and undresses (street clothes, underwear) above the waist, including prostheses, orthotics, fasteners, pullovers, etc.</p>                                                                                                            | <p>manoeuvring of limbs, physical guidance without taking weight</p> <p>4. Extensive assistance—Weight-bearing support (including lifting limbs) by 1 helper where person still performs 50% or more of subtasks</p> <p>5. Maximal assistance—Weight-bearing support (including lifting limbs) by 2+ helpers—OR—Weight-bearing support for more than 50% of subtasks</p> <p>6. Total dependence—Full performance by others during all episodes</p> <p>7. Activity did not occur during entire period</p>                                                                                                                                                                                     |                                                                                                                                                                                                                                                                                           |
| <p>d) Dressing lower body—How dresses and undresses (street clothes, underwear) from the waist down including prostheses, orthotics, belts, pants, skirts, shoes, fasteners, etc.</p> <p>0. Independent—No physical assistance, set-up, or supervision in any episode</p> <p>1. Independent, set-up help only—Article or device provided or placed within reach, no physical assistance or supervision in any episode</p> <p>2. Supervision—Oversight / cueing</p> <p>3. Limited assistance—Guided manoeuvring of limbs, physical guidance without taking weight</p> <p>4. Extensive assistance—Weight-bearing support (including lifting limbs) by 1 helper where person still</p> | <p>b) Personal hygiene—How manages personal hygiene, including combing hair, brushing teeth, shaving, applying make-up, washing and drying face and hands—<b>EXCLUDE BATHS AND SHOWERS</b></p> <p>0. Independent—No physical assistance, set-up, or supervision in any episode</p> <p>1. Independent, set-up help only—Article or device provided or placed within reach, no physical assistance or supervision in any episode</p> <p>2. Supervision—Oversight / cueing</p> <p>3. Limited assistance—Guided manoeuvring of limbs, physical guidance without taking weight</p> <p>4. Extensive assistance—Weight-bearing support (including lifting limbs) by 1 helper where person still</p> | <p>b) Personal hygiene—How manages personal hygiene, including combing hair, brushing teeth, shaving, applying make-up, washing and drying face and hands—<b>EXCLUDE BATHS AND SHOWERS</b></p> <p>0. Independent or set-up help only</p> <p>1. Supervision or any physical assistance</p> |

|                                                                                                                                                                                                                                                                                                                             |                                                                                                                                                                                                                                                                                                                                                                                                                                                                                                                                                                                                                                                                                                                                                                                                                                                     |                                                                                                                                                                                                                                                             |
|-----------------------------------------------------------------------------------------------------------------------------------------------------------------------------------------------------------------------------------------------------------------------------------------------------------------------------|-----------------------------------------------------------------------------------------------------------------------------------------------------------------------------------------------------------------------------------------------------------------------------------------------------------------------------------------------------------------------------------------------------------------------------------------------------------------------------------------------------------------------------------------------------------------------------------------------------------------------------------------------------------------------------------------------------------------------------------------------------------------------------------------------------------------------------------------------------|-------------------------------------------------------------------------------------------------------------------------------------------------------------------------------------------------------------------------------------------------------------|
| <p>performs 50% or more of subtasks</p> <p>5. Maximal assistance—Weight-bearing support (including lifting limbs) by 2+ helpers—OR—Weight-bearing support for more than 50% of subtasks</p> <p>6. Total dependence—Full performance by others during all episodes</p> <p>7. Activity did not occur during entire period</p> | <p>performs 50% or more of subtasks</p> <p>5. Maximal assistance—Weight-bearing support (including lifting limbs) by 2+ helpers—OR—Weight-bearing support for more than 50% of subtasks</p> <p>6. Total dependence—Full performance by others during all episodes</p> <p>7. Activity did not occur during entire period</p>                                                                                                                                                                                                                                                                                                                                                                                                                                                                                                                         |                                                                                                                                                                                                                                                             |
|                                                                                                                                                                                                                                                                                                                             | <p>c) Dressing upper body—How dresses and undresses (street clothes, underwear) above the waist, including prostheses, orthotics, fasteners, pullovers, etc.</p> <p>0. Independent—No physical assistance, set-up, or supervision in any episode</p> <p>1. Independent, set-up help only—Article or device provided or placed within reach, no physical assistance or supervision in any episode</p> <p>2. Supervision—Oversight / cueing</p> <p>3. Limited assistance—Guided manoeuvring of limbs, physical guidance without taking weight</p> <p>4. Extensive assistance—Weight-bearing support (including lifting limbs) by 1 helper where person still performs 50% or more of subtasks</p> <p>5. Maximal assistance—Weight-bearing support (including lifting limbs) by 2+ helpers—OR—Weight-bearing support for more than 50% of subtasks</p> | <p>c) Dressing upper body—How dresses and undresses (street clothes, underwear) above the waist, including prostheses, orthotics, fasteners, pullovers, etc.</p> <p>0. Independent or set-up help only</p> <p>1. Supervision or any physical assistance</p> |



1  
2  
3  
4  
5  
6  
7  
8  
9  
10  
11  
12  
13  
14  
15  
16  
17  
18  
19  
20  
21  
22  
23  
24  
25  
26  
27  
28  
29  
30  
31  
32  
33  
34  
35  
36  
37  
38  
39  
40  
41  
42  
43  
44  
45  
46  
47

|  |                                                                                                                                                                                                                                                                                                                                                                                                                                                                                                                                                                                                                                                                                                                                                                                                                                                                                                                                                                                                          |                                                                                                                                                                                                                                                                                  |
|--|----------------------------------------------------------------------------------------------------------------------------------------------------------------------------------------------------------------------------------------------------------------------------------------------------------------------------------------------------------------------------------------------------------------------------------------------------------------------------------------------------------------------------------------------------------------------------------------------------------------------------------------------------------------------------------------------------------------------------------------------------------------------------------------------------------------------------------------------------------------------------------------------------------------------------------------------------------------------------------------------------------|----------------------------------------------------------------------------------------------------------------------------------------------------------------------------------------------------------------------------------------------------------------------------------|
|  | <p>6. Total dependence—Full performance by others during all episodes</p> <p>7. Activity did not occur during entire period</p>                                                                                                                                                                                                                                                                                                                                                                                                                                                                                                                                                                                                                                                                                                                                                                                                                                                                          |                                                                                                                                                                                                                                                                                  |
|  | <p>d) Dressing lower body—How dresses and undresses (street clothes, underwear) from the waist down including prostheses, orthotics, belts, pants, skirts, shoes, fasteners, etc.</p> <p>0. Independent—No physical assistance, set-up, or supervision in any episode</p> <p>1. Independent, set-up help only—Article or device provided or placed within reach, no physical assistance or supervision in any episode</p> <p>2. Supervision—Oversight / cueing</p> <p>3. Limited assistance—Guided manoeuvring of limbs, physical guidance without taking weight</p> <p>4. Extensive assistance—Weight-bearing support (including lifting limbs) by 1 helper where person still performs 50% or more of subtasks</p> <p>5. Maximal assistance—Weight-bearing support (including lifting limbs) by 2+ helpers—OR—Weight-bearing support for more than 50% of subtasks</p> <p>6. Total dependence—Full performance by others during all episodes</p> <p>7. Activity did not occur during entire period</p> | <p>d) Dressing lower body—How dresses and undresses (street clothes, underwear) from the waist down including prostheses, orthotics, belts, pants, skirts, shoes, fasteners, etc.</p> <p>0. Independent or set-up help only</p> <p>1. Supervision or any physical assistance</p> |

1  
2  
3  
4  
5  
6  
7  
8  
9  
10  
11  
12  
13  
14  
15  
16  
17  
18  
19  
20  
21  
22  
23  
24  
25  
26  
27  
28  
29  
30  
31  
32  
33  
34  
35  
36  
37  
38  
39  
40  
41  
42  
43  
44  
45  
46  
47

For peer review only
