# Supplementary material for: Relevance of assessment items in community paramedicine home visit programmes: results of a modified Delphi study
Source: PubMed Central journal article supplement — BMJ Open. 2021 Nov 11;11(11):e048504. doi: 10.1136/bmjopen-2020-048504 (PMC8587454; doi:10.1136/bmjopen-2020-048504), 2021-11-11
Supplement: bmjopen-2020-048504supp001.pdf [file bmjopen-2020-048504supp001.pdf]

| Supplement Table 1: Example of presentation and modification of an assessment item across rounds (Note: selected sub-parts included in Table for illustrative purposes. Reproduced with permission from interRAI Canada).                                                                                                                                                                                                                                                                                                                                                                                                                                       |                                                                                                                                                                                                                                                                                                                                                                                                                                                                                                                                                                                                                    |                                                                                                                                                                                                                                                                                                                                                                                                                                                                                                           |
|-----------------------------------------------------------------------------------------------------------------------------------------------------------------------------------------------------------------------------------------------------------------------------------------------------------------------------------------------------------------------------------------------------------------------------------------------------------------------------------------------------------------------------------------------------------------------------------------------------------------------------------------------------------------|--------------------------------------------------------------------------------------------------------------------------------------------------------------------------------------------------------------------------------------------------------------------------------------------------------------------------------------------------------------------------------------------------------------------------------------------------------------------------------------------------------------------------------------------------------------------------------------------------------------------|-----------------------------------------------------------------------------------------------------------------------------------------------------------------------------------------------------------------------------------------------------------------------------------------------------------------------------------------------------------------------------------------------------------------------------------------------------------------------------------------------------------|
| Assessment item presented in Round #1                                                                                                                                                                                                                                                                                                                                                                                                                                                                                                                                                                                                                           | Modification of assessment item presented in Round #2                                                                                                                                                                                                                                                                                                                                                                                                                                                                                                                                                              | Modification of assessment item presented in Round #3                                                                                                                                                                                                                                                                                                                                                                                                                                                     |
|                                                                                                                                                                                                                                                                                                                                                                                                                                                                                                                                                                                                                                                                 | <p>Assessment should include determining a patient's <u>self-performance</u> of activities of daily living (ADLs). In your assessment, consider all episodes over 3-day period. Determine if all episodes are performed independently or if any episodes required supervision or assistance. To further explore these responses, we have divided the assessment item into separate ADLs. Please consider each of the following ADLs to include when assessing a patient for the first time, at a first visit:</p>                                                                                                  | <p>Assessment should include determining a patient's <u>self-performance</u> of activities of daily living (ADLs). In your assessment, consider all episodes over 3-day period. Determine if all episodes are performed independently or if any episodes required supervision or assistance. We have simplified responses to separate ADL assessment items to two possibilities. Please consider each of the following ADLs to include when assessing a patient for the first time, at a first visit.</p> |
| <p>Considering assessment of ability to perform activities of daily living (ADL). In each of the following areas, assessment determines what a patient's actual ability was over the 3-day period preceding the assessment. If all episodes are performed at the same level, score ADL at that level. If any episodes at level 6, and others less dependent, score ADL as a 5. Otherwise, focus on the three most dependent episodes [or all episodes if performed fewer than 3 times]. If most dependent episode is 1, score ADL as 1. If not, score ADL as least dependent of those episodes in range 2–5.</p> <p>a) Bathing—How takes a full-body bath /</p> | <p>a) Bathing—How takes a full-body bath / shower. Includes how transfers in and out of tub or shower AND how each part of body is bathed: arms, upper and lower legs, chest, abdomen, perineal area—<b>EXCLUDE WASHING OF BACK AND HAIR</b></p> <ol style="list-style-type: none"> <li>0. Independent—No physical assistance, set-up, or supervision in any episode</li> <li>1. Independent, set-up help only—Article or device provided or placed within reach, no physical assistance or supervision in any episode</li> <li>2. Supervision—Oversight / cueing</li> <li>3. Limited assistance—Guided</li> </ol> | <p>a) Bathing—How takes a full-body bath / shower. Includes how transfers in and out of tub or shower AND how each part of body is bathed: arms, upper and lower legs, chest, abdomen, perineal area—<b>EXCLUDE WASHING OF BACK AND HAIR</b></p> <ol style="list-style-type: none"> <li>0. Independent or set-up help only</li> <li>1. Supervision or any physical assistance</li> </ol>                                                                                                                  |

|                                                                                                                                                                                                                                                                                                                                                                                                                                                                                                                                                                                                                                                                                     |                                                                                                                                                                                                                                                                                                                                                                                                                                                                                                                                                                                                                                                                                       |                                                                                                                                                                                                                                                                                    |
|-------------------------------------------------------------------------------------------------------------------------------------------------------------------------------------------------------------------------------------------------------------------------------------------------------------------------------------------------------------------------------------------------------------------------------------------------------------------------------------------------------------------------------------------------------------------------------------------------------------------------------------------------------------------------------------|---------------------------------------------------------------------------------------------------------------------------------------------------------------------------------------------------------------------------------------------------------------------------------------------------------------------------------------------------------------------------------------------------------------------------------------------------------------------------------------------------------------------------------------------------------------------------------------------------------------------------------------------------------------------------------------|------------------------------------------------------------------------------------------------------------------------------------------------------------------------------------------------------------------------------------------------------------------------------------|
| <p>shower. Includes how transfers in and out of tub or shower AND how each part of body is bathed: arms, upper and lower legs, chest, abdomen, perineal area—EXCLUDE WASHING OF BACK AND HAIR</p> <p>b) Personal hygiene—How manages personal hygiene, including combing hair, brushing teeth, shaving, applying make-up, washing and drying face and hands—EXCLUDE BATHS AND SHOWERS</p> <p>c) Dressing upper body—How dresses and undresses (street clothes, underwear) above the waist, including prostheses, orthotics, fasteners, pullovers, etc.</p>                                                                                                                          | <p>manoeuvring of limbs, physical guidance without taking weight</p> <p>4. Extensive assistance—Weight-bearing support (including lifting limbs) by 1 helper where person still performs 50% or more of subtasks</p> <p>5. Maximal assistance—Weight-bearing support (including lifting limbs) by 2+ helpers—OR—Weight-bearing support for more than 50% of subtasks</p> <p>6. Total dependence—Full performance by others during all episodes</p> <p>7. Activity did not occur during entire period</p>                                                                                                                                                                              |                                                                                                                                                                                                                                                                                    |
| <p>d) Dressing lower body—How dresses and undresses (street clothes, underwear) from the waist down including prostheses, orthotics, belts, pants, skirts, shoes, fasteners, etc.</p> <p>0. Independent—No physical assistance, set-up, or supervision in any episode</p> <p>1. Independent, set-up help only—Article or device provided or placed within reach, no physical assistance or supervision in any episode</p> <p>2. Supervision—Oversight / cueing</p> <p>3. Limited assistance—Guided manoeuvring of limbs, physical guidance without taking weight</p> <p>4. Extensive assistance—Weight-bearing support (including lifting limbs) by 1 helper where person still</p> | <p>b) Personal hygiene—How manages personal hygiene, including combing hair, brushing teeth, shaving, applying make-up, washing and drying face and hands—EXCLUDE BATHS AND SHOWERS</p> <p>0. Independent—No physical assistance, set-up, or supervision in any episode</p> <p>1. Independent, set-up help only—Article or device provided or placed within reach, no physical assistance or supervision in any episode</p> <p>2. Supervision—Oversight / cueing</p> <p>3. Limited assistance—Guided manoeuvring of limbs, physical guidance without taking weight</p> <p>4. Extensive assistance—Weight-bearing support (including lifting limbs) by 1 helper where person still</p> | <p>b) Personal hygiene—How manages personal hygiene, including combing hair, brushing teeth, shaving, applying make-up, washing and drying face and hands—EXCLUDE BATHS AND SHOWERS</p> <p>0. Independent or set-up help only</p> <p>1. Supervision or any physical assistance</p> |

|                                                                                                                                                                                                                                                                                                                             |                                                                                                                                                                                                                                                                                                                                                                                                                                                                                                                                                                                                                                                                                                                                                                                                                                                     |                                                                                                                                                                                                                                                             |
|-----------------------------------------------------------------------------------------------------------------------------------------------------------------------------------------------------------------------------------------------------------------------------------------------------------------------------|-----------------------------------------------------------------------------------------------------------------------------------------------------------------------------------------------------------------------------------------------------------------------------------------------------------------------------------------------------------------------------------------------------------------------------------------------------------------------------------------------------------------------------------------------------------------------------------------------------------------------------------------------------------------------------------------------------------------------------------------------------------------------------------------------------------------------------------------------------|-------------------------------------------------------------------------------------------------------------------------------------------------------------------------------------------------------------------------------------------------------------|
| <p>performs 50% or more of subtasks</p> <p>5. Maximal assistance—Weight-bearing support (including lifting limbs) by 2+ helpers—OR—Weight-bearing support for more than 50% of subtasks</p> <p>6. Total dependence—Full performance by others during all episodes</p> <p>7. Activity did not occur during entire period</p> | <p>performs 50% or more of subtasks</p> <p>5. Maximal assistance—Weight-bearing support (including lifting limbs) by 2+ helpers—OR—Weight-bearing support for more than 50% of subtasks</p> <p>6. Total dependence—Full performance by others during all episodes</p> <p>7. Activity did not occur during entire period</p>                                                                                                                                                                                                                                                                                                                                                                                                                                                                                                                         |                                                                                                                                                                                                                                                             |
|                                                                                                                                                                                                                                                                                                                             | <p>c) Dressing upper body—How dresses and undresses (street clothes, underwear) above the waist, including prostheses, orthotics, fasteners, pullovers, etc.</p> <p>0. Independent—No physical assistance, set-up, or supervision in any episode</p> <p>1. Independent, set-up help only—Article or device provided or placed within reach, no physical assistance or supervision in any episode</p> <p>2. Supervision—Oversight / cueing</p> <p>3. Limited assistance—Guided manoeuvring of limbs, physical guidance without taking weight</p> <p>4. Extensive assistance—Weight-bearing support (including lifting limbs) by 1 helper where person still performs 50% or more of subtasks</p> <p>5. Maximal assistance—Weight-bearing support (including lifting limbs) by 2+ helpers—OR—Weight-bearing support for more than 50% of subtasks</p> | <p>c) Dressing upper body—How dresses and undresses (street clothes, underwear) above the waist, including prostheses, orthotics, fasteners, pullovers, etc.</p> <p>0. Independent or set-up help only</p> <p>1. Supervision or any physical assistance</p> |

|  |                                                                                                                                                                                                                                                                                                                                                                                                                                                                                                                                                                                                                                                                                                                                                                                                                                                                                                                                                                                                                                                                   |                                                                                                                                                                                                                                                                                                                               |
|--|-------------------------------------------------------------------------------------------------------------------------------------------------------------------------------------------------------------------------------------------------------------------------------------------------------------------------------------------------------------------------------------------------------------------------------------------------------------------------------------------------------------------------------------------------------------------------------------------------------------------------------------------------------------------------------------------------------------------------------------------------------------------------------------------------------------------------------------------------------------------------------------------------------------------------------------------------------------------------------------------------------------------------------------------------------------------|-------------------------------------------------------------------------------------------------------------------------------------------------------------------------------------------------------------------------------------------------------------------------------------------------------------------------------|
|  | <ol style="list-style-type: none"> <li>6. Total dependence—Full performance by others during all episodes</li> <li>7. Activity did not occur during entire period</li> </ol>                                                                                                                                                                                                                                                                                                                                                                                                                                                                                                                                                                                                                                                                                                                                                                                                                                                                                      |                                                                                                                                                                                                                                                                                                                               |
|  | <p>d) Dressing lower body—How dresses and undresses (street clothes, underwear) from the waist down including prostheses, orthotics, belts, pants, skirts, shoes, fasteners, etc.</p> <ol style="list-style-type: none"> <li>0. Independent—No physical assistance, set-up, or supervision in any episode</li> <li>1. Independent, set-up help only—Article or device provided or placed within reach, no physical assistance or supervision in any episode</li> <li>2. Supervision—Oversight / cueing</li> <li>3. Limited assistance—Guided manoeuvring of limbs, physical guidance without taking weight</li> <li>4. Extensive assistance—Weight-bearing support (including lifting limbs) by 1 helper where person still performs 50% or more of subtasks</li> <li>5. Maximal assistance—Weight-bearing support (including lifting limbs) by 2+ helpers—OR—Weight-bearing support for more than 50% of subtasks</li> <li>6. Total dependence—Full performance by others during all episodes</li> <li>7. Activity did not occur during entire period</li> </ol> | <p>d) Dressing lower body—How dresses and undresses (street clothes, underwear) from the waist down including prostheses, orthotics, belts, pants, skirts, shoes, fasteners, etc.</p> <ol style="list-style-type: none"> <li>0. Independent or set-up help only</li> <li>1. Supervision or any physical assistance</li> </ol> |
